# Supplementary material for: The Geriatric Emergency Care Applied Research (GEAR) network approach: a protocol to advance stakeholder consensus and research priorities in geriatrics and dementia care in the emergency department
Source: PubMed Central journal article supplement — BMJ Open. 2022 Apr 22;12(4):e060974. doi: 10.1136/bmjopen-2022-060974 (PMC9036447; doi:10.1136/bmjopen-2022-060974), 2022-04-22
Supplement: bmjopen-2022-060974.draft_revisions.pdf [file bmjopen-2022-060974.draft_revisions.pdf]

# BMJ Open

BMJ Open is committed to open peer review. As part of this commitment we make the peer review history of every article we publish publicly available.

When an article is published we post the peer reviewers' comments and the authors' responses online. We also post the versions of the paper that were used during peer review. These are the versions that the peer review comments apply to.

The versions of the paper that follow are the versions that were submitted during the peer review process. They are not the versions of record or the final published versions. They should not be cited or distributed as the published version of this manuscript.

BMJ Open is an open access journal and the full, final, typeset and author-corrected version of record of the manuscript is available on our site with no access controls, subscription charges or pay-per-view fees (<http://bmjopen.bmj.com>).

If you have any questions on BMJ Open's open peer review process please email [info.bmjopen@bmj.com](mailto:info.bmjopen@bmj.com)

# BMJ Open

## The Geriatric Emergency care Applied Research (GEAR) Network Approach: A Protocol To Advance Stakeholder Consensus and Research Priorities in Geriatrics and Dementia Care in the Emergency Department

|                               |                                                                                                                                                                                                                                                                                                                                                                                                                                                                                                                                                                                                                                                                                                                                                                                                                                                                                                                                                                                                                                                                                                                                                                                |
|-------------------------------|--------------------------------------------------------------------------------------------------------------------------------------------------------------------------------------------------------------------------------------------------------------------------------------------------------------------------------------------------------------------------------------------------------------------------------------------------------------------------------------------------------------------------------------------------------------------------------------------------------------------------------------------------------------------------------------------------------------------------------------------------------------------------------------------------------------------------------------------------------------------------------------------------------------------------------------------------------------------------------------------------------------------------------------------------------------------------------------------------------------------------------------------------------------------------------|
| Journal:                      | <i>BMJ Open</i>                                                                                                                                                                                                                                                                                                                                                                                                                                                                                                                                                                                                                                                                                                                                                                                                                                                                                                                                                                                                                                                                                                                                                                |
| Manuscript ID                 | bmjopen-2022-060974                                                                                                                                                                                                                                                                                                                                                                                                                                                                                                                                                                                                                                                                                                                                                                                                                                                                                                                                                                                                                                                                                                                                                            |
| Article Type:                 | Protocol                                                                                                                                                                                                                                                                                                                                                                                                                                                                                                                                                                                                                                                                                                                                                                                                                                                                                                                                                                                                                                                                                                                                                                       |
| Date Submitted by the Author: | 20-Jan-2022                                                                                                                                                                                                                                                                                                                                                                                                                                                                                                                                                                                                                                                                                                                                                                                                                                                                                                                                                                                                                                                                                                                                                                    |
| Complete List of Authors:     | Hwang, Ula; Yale School of Medicine, Department of Emergency Medicine; James J Peters VA Medical Center, Geriatric Research, Education and Clinical Center<br>Carpenter, Chris; Washington University in St Louis School of Medicine, Washington University Division of Emergency Medicine<br>Dresden, Scott; Northwestern University Feinberg School of Medicine, Department of Emergency Medicine<br>Dussetschleger, Jeffrey; Yale School of Medicine, Department of Emergency Medicine<br>Gifford, Angela; University of Wisconsin-Madison, BerbeeWalsh Department of Emergency Medicine<br>Hoang, Ly; University of Wisconsin-Madison, BerbeeWalsh Department of Emergency Medicine<br>Leggett, Jesseca; Washington University in St Louis School of Medicine, Department of Emergency Medicine and Emergency Care Research Core<br>Nowroozpoor, Armin; Yale School of Medicine, Department of Emergency Medicine; Duke University School of Medicine<br>Taylor, Zachary; Northwestern University Feinberg School of Medicine, Department of Emergency Medicine<br>Shah, Manish; University of Wisconsin-Madison, Networks, The GEAR and GEAR 2.0; Yale School of Medicine |
| Keywords:                     | Dementia < NEUROLOGY, ACCIDENT & EMERGENCY MEDICINE, GERIATRIC MEDICINE                                                                                                                                                                                                                                                                                                                                                                                                                                                                                                                                                                                                                                                                                                                                                                                                                                                                                                                                                                                                                                                                                                        |
|                               |                                                                                                                                                                                                                                                                                                                                                                                                                                                                                                                                                                                                                                                                                                                                                                                                                                                                                                                                                                                                                                                                                                                                                                                |

SCHOLARONE™  
Manuscripts

1  
2  
3  
4  
5  
6  
7  
8  
9

## **The Geriatric Emergency care Applied Research (GEAR) Network Approach: A Protocol To Advance Stakeholder Consensus and Research Priorities in Geriatrics and Dementia Care in the Emergency Department**

10 Ula Hwang, MD, MPH ([ula.hwang@yale.edu](mailto:ula.hwang@yale.edu)), Department of Emergency Medicine, Yale School  
11 of Medicine, 464 Congress Ave, New Haven, CT 06519, USA (Corresponding author)  
12 Phone: (203) 785-4363, Fax: (203) 785-4580  
13  
14

15 Christopher R. Carpenter, MD, MSc ([carpenterc@wustl.edu](mailto:carpenterc@wustl.edu)), Washington University in St. Louis  
16 School of Medicine, Department of Emergency Medicine and Emergency Care Research Core,  
17 St. Louis, MO 63110, USA  
18  
19

20 Scott Dresden, MD, MS ([s-dresden@northwestern.edu](mailto:s-dresden@northwestern.edu)), Northwestern University Feinberg  
21 School of Medicine, Department of Emergency Medicine, Chicago, IL 60611, USA  
22  
23

24 Jeffrey Dussetschleger, DDS, MPH ([jeffrey.dussetschleger@yale.edu](mailto:jeffrey.dussetschleger@yale.edu)), Department of  
25 Emergency Medicine, Yale School of Medicine, 464 Congress Ave, New Haven, CT 06519, USA  
26  
27

28 Angela Gifford, MA ([agifford@medicine.wisc.edu](mailto:agifford@medicine.wisc.edu)), BerbeeWalsh Department of Emergency  
29 Medicine, University of Wisconsin-Madison, 800 University Bay Drive, Suite 310, Madison, WI  
30 53705, USA  
31  
32

33 Ly Hoang, BS ([lhoang@medicine.wisc.edu](mailto:lhoang@medicine.wisc.edu)), BerbeeWalsh Department of Emergency Medicine,  
34 University of Wisconsin-Madison, 800 University Bay Drive, Suite 310, Madison, WI 53705, USA  
35  
36

37 Jesseca Leggett, MBA candidate ([jleggett@wustl.edu](mailto:jleggett@wustl.edu)), Washington University in St. Louis School  
38 of Medicine, Department of Emergency Medicine and Emergency Care Research Core, St. Louis,  
39 MO 63110, USA  
40

41 Armin Nowroozpoor, MD ([armin.nowroozpoor@yale.edu](mailto:armin.nowroozpoor@yale.edu)), Department of Emergency  
42 Medicine, Duke University School of Medicine, Durham, North Carolina, 27710, USA  
43 Dr. Nowroozpoor was a Postdoctoral Associate in the Department of Emergency Medicine at  
44 Yale University School of Medicine at the time of this work.  
45  
46

47 Zachary Taylor, BS ([zachary.taylor@northwestern.edu](mailto:zachary.taylor@northwestern.edu)), Northwestern University Feinberg  
48 School of Medicine, Department of Emergency Medicine, Chicago, IL 60611, USA  
49  
50

51 Manish N. Shah, MD, MPH ([mnshah@medicine.wisc.edu](mailto:mnshah@medicine.wisc.edu)), BerbeeWalsh Department of  
52 Emergency Medicine, University of Wisconsin-Madison, 800 University Bay Drive, Suite 310,  
53 Madison, WI 53705, USA  
54  
55

56 On behalf of The GEAR\* and GEAR 2.0\*\* Networks  
57  
58  
59  
60

1  
2  
3  
4  
5  
6  
7  
8  
9  
10  
11  
12  
13  
14  
15  
16  
17  
18  
19  
20  
21  
22  
23  
24  
25  
26  
27  
28  
29  
30  
31  
32  
33  
34  
35  
36  
37  
38  
39  
40  
41  
42  
43  
44  
45  
46  
47  
48  
49  
50  
51  
52  
53  
54  
55  
56  
57  
58  
59  
60

For peer review only

1  
2  
3 *Acknowledgements:*  
4  
5

6 **GEAR Network consists of:**

7 M. Fernando Bellolio, Kevin Biese, Christine Binkley, Nicolas Bott, Abraham Brody, Christopher  
8 Carpenter, Sunday Clark, Scott Dresden, Savannah Forester, Cameron Gettel, Elizabeth Goldberg, Allyson  
9 Greenberg, Nada Hammouda, Jin Han, Nicole S. Hastings, Teresita Hogan, William Hung, Ula Hwang, Jay  
10 Kayser, Maura Kennedy, Kelly Ko, Adriane Lesser, Elizabeth Linton, Shan Liu, Aaron Malsch, Don Melady,  
11 Carmen Morano, Nancy Morrow-Howell, Denise Nassisi, Lori Nerbonne, Sylvie Nyamu, Ugochi  
12 Ohuabunwa, Timothy Platts-Mills, Luna Ragsdale, Lynne Richardson, Thom Ringer, Anthony Rosen, Mark  
13 Rosenberg, Manish Shah, Rachel Skains, Stephanie Skees, Kimberly Souffront, Laura Stabler, Connor  
14 Sullivan, Joseph Suyama, Samuel Vargas, E. Camille Vaughan, Corrine Voils, Daniel Wei.  
15

16  
17 **GEAR 2.0 Network consists of:**

18 Heather Allore, Amy Aloysi, Michael Belleville, M. Fernanda Bellolio, Marian Betz, Kevin Biese, Cynthia  
19 Brandt, Ryan Carnahan, David Carr, Jennie Chin-Hansen, Morgan Daven, Nida Degesys, Michael  
20 Ellenbogen, Marcus Escobedo, Jason Falvey, Thomas Gill, Andrea Gilmore-Bykovskyi, Elizabeth Goldberg,  
21 Jin Han, James Hardy, Susan (Nicki) Hastings, Jon Mark Hirshon, Teresita Hogan, William Hung, Eric  
22 Isaacs, Kathleen Kelly, Maura Kennedy, Amy JH Kind, Caitlin Malicki, Michael Malone, Richard Marottoli,  
23 Michelle Moccia, Vincent Mor, John Morris, Nancy Morrow Howell, Armin Nowroozpoor, Ugochi  
24 Ohuabunwa, Brenda Oiyemhonlan, William Perry, Maria Raven, Kristin Rising, Mary Sano, Laura Stabler,  
25 Conor Sullivan, Joseph Suyama, Jeremy Swartzberg, Vaishal Tolia, Allan Vann, Sandra Weintraub, and  
26 Susan Ziemann.  
27  
28  
29  
30  
31  
32  
33

34 **Keywords:** Emergency Medicine, geriatrics, dementia, research priorities, stakeholder,  
35 consensus  
36  
37

38 **Word Count:** 3777  
39  
40  
41  
42  
43  
44  
45  
46  
47  
48  
49  
50  
51  
52  
53  
54  
55  
56  
57  
58  
59  
60

## ABSTRACT

### Introduction

Increasingly, older adults are turning to emergency departments (EDs) to address health care needs. To achieve these research demands, infrastructure is needed to both generate evidence of intervention impact and advance development of implementation science, pragmatic trials evaluation, and dissemination of findings from studies addressing the emergency care needs of older adults. The Geriatric Emergency Care Applied Research Network (<https://gearnetwork.org>) has been created in response to these scientific needs – to build a transdisciplinary infrastructure to support the research that will optimize emergency care for older adults and persons living with dementia (PLWD).

### Methods and Analysis

In this paper we describe the GEAR Network infrastructure and its approach with scoping reviews to identify research and clinical gaps and then come to consensus-driven research priorities by a transdisciplinary taskforce of stakeholders that includes patients and care partners. We describe how priority topic areas are ascertained, the process of conducting scoping reviews with integrated academic librarians performing standardized searches and providing quality control on reviews, input and support from the taskforce, and conducting a large-scale consensus workshop to prioritize future research topics. The GEAR Network approach provides a framework and systematic approach to develop a research agenda and support research in geriatric emergency care.

## Ethics and dissemination

This is a systematic review of previously conducted research; accordingly, it does not constitute human subjects research needing ethics review. This review will be prepared as a manuscript and submitted for publication to a peer-reviewed journal, and the results will be presented at conferences.

Open Science Framework registered DOI: [10.17605/OSF.IO/6QRYX](https://doi.org/10.17605/OSF.IO/6QRYX), [10.17605/OSF.IO/AKVZ8](https://doi.org/10.17605/OSF.IO/AKVZ8),  
[10.17605/OSF.IO/EPVR5](https://doi.org/10.17605/OSF.IO/EPVR5), [10.17605/OSF.IO/VXPRS](https://doi.org/10.17605/OSF.IO/VXPRS)

## Strengths and limitations of the study:

- The inclusion of transdisciplinary stakeholder participants as part of the scoping review and consensus process to identify research gaps and priorities.
- Cross coordination with medical librarians of scoping review searches.
- Creation of a Health Equity Advisory Board to ensure meaningful inclusion of diverse populations in studies focused on the emergency care of people living with dementia.
- A well-defined search strategy created by a team of academic research librarians to search a broad group of databases.
- Small body of published literature in topic areas.

## INTRODUCTION

Increasingly, older adults are turning to emergency departments (EDs) to address health care needs.<sup>1,2</sup> Older adults (aged 65 and older) in the United States visit the ED at a rate of 51.1 per 100 persons per year.<sup>3</sup> Recommendations to transform EDs to better care for older adults have included redesigning services and processes.<sup>4-6</sup> Geriatric emergency care and Geriatric EDs (GEDs) have emerged over the past decade as innovative solutions to better provide emergency care for older adults.<sup>4,6-8</sup> However, many of the processes, protocols, and care models targeting older patients with emergency care remain untested in the unique ED setting. Consequently, *the impact of geriatric emergency care for older adults is unknown.*<sup>9,10</sup> Further, novel interventions and best practices tailored to the ED setting need to be developed for both older adults and persons living with dementia (PLWD). To achieve these research demands, infrastructure is needed for GEDs to both generate evidence of intervention impact and advance development of implementation science, pragmatic trials evaluation, and dissemination of findings from these studies.<sup>11</sup>

The Geriatric Emergency Care Applied Research (GEAR) Network was created in response to these scientific needs – to build a transdisciplinary infrastructure to support the research that will optimize emergency care for older adults and PLWD.<sup>12</sup> The GEAR Network (<https://gearnetwork.org>) is supported by the National Institute on Aging (NIA) and partner organizations, The Gary and Mary West Health Institute and The John A. Hartford Foundation (jointly on the The Geriatric Emergency Department Collaborative grant) with two phased awards: GEAR (R33 AG058926) and GEAR 2.0 - Advancing Dementia Care (GEAR 2.0 ADC) (R61 AG069822). In the first phase of both awards, key stakeholders from emergency medicine,



1  
2  
3 geriatrics, nursing, psychiatry, pharmacy, social work, individuals representing health care  
4  
5 systems, clinicians, researchers, medical specialty organizations, advocacy organizations,  
6  
7 caregivers, older adults, and people living with dementia to identify consensus-driven research  
8  
9 priorities that will improve the care of older adults (GEAR). GEAR 2.0 ADC added PLWD and  
10  
11 care partners to the team. The second phase consists of pilot grant funding to support  
12  
13 investigators that advance research priorities identified by stakeholder consensus.  
14  
15

16  
17  
18 The original GEAR project (hereafter referred to simply as GEAR) is dedicated to  
19  
20 improving ED care of the older adult and focused on the priority topics of: care transitions,  
21  
22 cognitive impairment – delirium, medication safety, elder abuse, and falls. Four of the five GEAR  
23  
24 research priorities have already been published using this approach.<sup>13-16</sup> GEAR 2.0 ADC is  
25  
26 focused on optimizing emergency care for persons living with dementia and their care partners  
27  
28 in the priority areas of: ED practices, ED care transitions, detection, and communication and  
29  
30 shared decision making.  
31  
32  
33

34  
35 In this paper we describe the Phase 1 methods used by GEAR 2.0 ADC to identify  
36  
37 consensus-driven research priorities, which were based on methods used for GEAR. We  
38  
39 describe how we identified the priority topic areas, conducted scoping reviews in each topic  
40  
41 area while integrating input from a transdisciplinary stakeholder taskforce, integrated academic  
42  
43 librarians in the review process to perform standardized searches and provide quality control,  
44  
45 and conducted a large-scale consensus conference to prioritize future research. The GEAR  
46  
47 Network approach may be valuable for other specialties, disciplines, and organizations  
48  
49 attempting to identify research and practice gaps, generate evidence, build collaborations, and  
50  
51 target high-yield research questions to optimize the care of older adults.  
52  
53  
54  
55  
56  
57  
58  
59  
60

## METHODS / DESIGN

### GEAR 2.0 ADC Design and Structure

Like GEAR, GEAR 2.0 ADC is a phased program that provides infrastructure to the support mission of increasing transdisciplinary research to improve emergency care for persons living with dementia and their care partners. The organizational structure of GEAR 2.0 ADC (Figure 1) consists of committees that guide operations, a taskforce of stakeholder members that join workgroups and participate in the consensus conference during the first phase (2 years), and Cores that support training and expert consultation for pilot studies that will be conducted during the second phase (3 years).

#### The Executive Committee

GEAR 2.0 ADC is operationally coordinated by the Executive Committee that oversees and guides the program and activities in both phases. The Executive Committee is led by geriatric emergency medicine investigators who also lead one of the 4 priority topic workgroups. Each of these leads were selected based on geriatric emergency medicine expertise and the concurrent engagement of local Alzheimer's Disease Research Center faculty at their sites. These investigators supervise the GEAR 2.0 ADC efforts and meet virtually on a biweekly basis.

#### The Oversight Committee

1  
2  
3 The Oversight Committee consists of content experts in geriatrics, emergency medicine,  
4  
5 and Alzheimer's Disease and Related Disorders (ADRD) that provides high-level guidance to the  
6  
7 Executive Committee during quarterly meetings. Representatives from the NIA also participate  
8  
9 in these meetings to hear updates and progress of GEAR 2.0 ADC activities. The Oversight  
10  
11 Committee provides interdisciplinary guidance on the project direction, content and research  
12  
13 approaches, and future directions to address cross-disciplinary gaps highlighted by the  
14  
15 American Geriatrics Society conference series.<sup>17</sup>  
16  
17  
18  
19  
20  
21  
22

### 23 Health Equity Advisory Board

24  
25 To address the need for greater equity in emergency care research in geriatrics and  
26  
27 dementia care both with regards to PLWD, care partners, and researchers, a Health Equity  
28  
29 Advisory Board (HEAB) was created. The HEAB provides guidance and feedback on GEAR 2.0  
30  
31 ADC activities, to ensure meaningful inclusion of diverse populations in studies focused on the  
32  
33 emergency care of people living with dementia. HEAB members include PLWD, their caregiver  
34  
35 and care partners, advocates, and stakeholders all from underrepresented populations or  
36  
37 groups. Current board members include individuals that are African American, Hispanic, Asian,  
38  
39 and lesbian. The HEAB will follow the NIA Health Disparities Research Framework<sup>18</sup> approach  
40  
41 and will work with partner organizations like the IMPACT (Imbedded Pragmatic Alzheimer's  
42  
43 disease and AD-Related Dementias Clinical Trials) Collaboratory, an organization that is  
44  
45 developing strategies to address diversity and inclusion in studies focused on PLWD.<sup>19</sup>  
46  
47  
48  
49  
50  
51  
52  
53

### 54 Project Team Staff

1  
2  
3 GEAR 2.0 ADC activities are supported by smaller project teams where each of the  
4 Executive Committee leads are located. Local project team members include a research  
5 coordinator and academic medical school librarian to facilitate GEAR 2.0 ADC activities, the bulk  
6 of which includes including conducting the scoping reviews. Additional activities of the  
7 research coordinators include coordinating communication with all members, and organizing  
8 meetings (including presentations, recordings, minute preparation).  
9  
10  
11  
12  
13  
14  
15  
16  
17  
18  
19

20 *Patient and Public Involvement Statements:*  
21

22  
23 Throughout the Methods, the involvement, inclusion, and representation of patients,  
24 and public partners are described. The GEAR 2.0 ADC Taskforce and Workgroups are  
25 transdisciplinary groups of stakeholders committed to improve the emergency care of PLWD.  
26  
27 Members were identified to participate based on content expertise, their positions in partner  
28 organizations, and referrals from other invited members. The Executive Committee invited  
29 participants to ensure diversity of background and expertise while ensuring a manageable  
30 group size. They include emergency physicians, geriatricians, neurologists, psychiatrists,  
31 neuropsychologists, nurses, social workers, pharmacists, physical therapists, patient advocates,  
32 and most importantly PLWD and their care partners.  
33  
34  
35  
36  
37  
38  
39  
40  
41  
42  
43  
44  
45  
46

47 GEAR 2.0 ADC Taskforce and Workgroups  
48

49 The GEAR 2.0 ADC Taskforce is a transdisciplinary group of stakeholders committed to  
50 improve the emergency care of PLWD. Members were identified to participate based on  
51 content expertise, their positions in partner organizations, and referrals from other invited  
52  
53  
54  
55  
56  
57  
58  
59  
60

1  
2  
3 members. The Executive Committee invited participants to ensure diversity of background and  
4  
5 expertise while ensuring a manageable group size. They include emergency physicians,  
6  
7 geriatricians, neurologists, psychiatrists, neuropsychologists, nurses, social workers,  
8  
9 pharmacists, physical therapists, patient advocates, and most importantly PLWD and their care  
10  
11 partners. (Figure 2)  
12  
13

14  
15 Taskforce members participate on one or more workgroups that represented research  
16  
17 and clinical practice priorities in four topics (see below for how these topics were chosen):  
18  
19

- 20 1. Optimal ED care practices for PLWD and their caregivers (ED Practices)
- 21 2. Optimal ED care transitions for PLWD and their caregivers (ED Care Transitions)
- 22 3. Approaches to identify ED PLWD (diagnosed and undiagnosed ADRD) (Detection)
- 23 4. Approaches to communication and shared decision making in ED treatment and  
24  
25 disposition for PLWD and their caregivers (Communication and decision making).  
26  
27  
28  
29  
30  
31  
32  
33  
34  
35  
36  
37

## 38 Approach

### 39 GEAR 2.0 ADC operational overview

40  
41  
42 During the first phase, GEAR 2.0 ADC identified and prioritized research by completing  
43  
44 scoping reviews in each of the priority topics and then held a two-day consensus conference of  
45  
46 key stakeholders who discussed and voted on research priorities to optimize emergency care  
47  
48 for PLWD. The GEAR Network Consensus Conference approach is modeled after the Cornell  
49  
50 Institute for Translational Research on Aging (CITRA) process for developing stakeholder-based  
51  
52  
53  
54  
55  
56  
57  
58  
59  
60

1  
2  
3 translational research agendas in aging.<sup>20</sup> Unlike CITRA, the GEAR Network approach has more  
4  
5 extensive preparatory work prior to the consensus conference that includes completion of  
6  
7 scoping reviews in pre-selected priority areas prior to the Consensus Conference. Completion  
8  
9 of the scoping review required: 1. Proposing initial research priorities in each of the domains. 2.  
10  
11 Using a Population, Intervention, Comparison, Outcome (PICO) framework for the research  
12  
13 questions to conduct structured literature searches with academic librarians to identify  
14  
15 publications related to the domains (Round 1 priority research questions), 3. Summarizing the  
16  
17 most recent scientific reviews of ED-based trials, observational, and/or retrospective studies (if  
18  
19 any) that address the priority area, 4. Extracting major conclusions from relevant literature  
20  
21 identified or other systematic reviews related to the PICO question. The results of the scoping  
22  
23 reviews were then used as the basis for discussion and considerations of research priorities at  
24  
25 the consensus conference.  
26  
27  
28  
29  
30  
31

32 During the second phase, GEAR 2.0 ADC will fund pilot studies that encourage  
33  
34 transdisciplinary collaboration to address the research priorities ranked by the stakeholders  
35  
36 from the first phase.  
37  
38  
39  
40  
41

#### 42 Priority Domain Determination 43

44 GEAR 2.0 ADC Taskforce members ranked priority topics in December 2019 during the  
45  
46 grant proposal preparation process. The Executive Committee proposed the multiple priority  
47  
48 topics which the Taskforce ranked. These were then emailed as a survey to Taskforce members  
49  
50 to rank the importance of each topic and the top ones were selected to be the focus of GEAR  
51  
52  
53  
54  
55  
56  
57  
58  
59  
60

1  
2  
3 2.0 ADC activities. Based on past experience in GEAR, the decision was made to limit efforts to  
4  
5 four workgroups based on capacity and workload.  
6  
7  
8  
9

#### 10 Workgroup Pre-Conference Activities

11  
12  
13 Each workgroup was led by an Executive Committee member lead and supported by the  
14  
15 Project Team Staff. At the study kickoff meeting, Taskforce members were invited to participate  
16  
17 in any of the four workgroups representing research and practice priority domains. Taskforce  
18  
19 members joined workgroups based on their interests and expertise, noting their preferences  
20  
21 through an online survey. Though most requests were honored, some respondents were  
22  
23 assigned to non-primary choices to ensure diversity of background and maintain workable  
24  
25 group sizes of 12-14 participants. While participants were encouraged to only engage with one  
26  
27 group, a number engaged in multiple groups.  
28  
29  
30  
31

32  
33 Each workgroup's leader developed a charter document that consisted of a description  
34  
35 of the workgroup's topic, goals, meeting dates, membership list, as well as expectations of both  
36  
37 group leadership and participants. All workgroups met monthly for one hour, while work  
38  
39 continued asynchronously through emails moderated by the group leadership. Files are  
40  
41 accessible through cloud-based file sharing tools and servers to provide a single source of  
42  
43 information for all members. These workgroup meetings served to review the progress of the  
44  
45 project, to discuss and reflect on project findings, and to frame project directions. Workgroups  
46  
47 particularly had extensive discussions to develop key questions and identify research gaps using  
48  
49 the PICO approach.<sup>21</sup>  
50  
51  
52  
53  
54  
55  
56  
57  
58  
59  
60

## Phase 1: Scoping Review Process

In preparation for the GEAR 2.0 ADC Consensus Conference, scoping reviews were conducted in the four domains. We followed the PRISMA ScR – Scoping review checklist process to explore both the breadth of literature in this area and identify the knowledge and practice gaps.<sup>22</sup> Scoping reviews are preferred for this type of work as they incorporate a wider range of literature than systematic reviews and can provide more synthesized ideas for future systematic reviews.<sup>22, 23</sup>

### *Development of PICO Research Questions*

Each workgroup brainstormed potential PICO questions within their domains. The workgroups iteratively refined and reviewed the questions and then submitted them to the Executive Committee for review. Each workgroup had approximately 20 questions. The Executive Committee, through joint discussion among the workgroup leads, ensured that questions were distinct. The full Taskforce ranked questions for each workgroup via an online survey (Qualtrics). A respondent weighting system was used to identify the top research questions with workgroup members' ranking weighted double that of other taskforce members. The top two questions were then formatted using the PICO approach.<sup>21</sup> (Tables 1-4)

Table 1. Communication and Decision-Making PICO Research Questions

| Preliminary PICO Questions                                                                                                                                                                                                                                                                                                      | Final Two PICO Questions                                                                                                      |
|---------------------------------------------------------------------------------------------------------------------------------------------------------------------------------------------------------------------------------------------------------------------------------------------------------------------------------|-------------------------------------------------------------------------------------------------------------------------------|
| 1. As a decision-making strategy, does accelerated triage for patients with severe dementia improve the process or outcomes of ED care?<br>2. How does “communication and decision-making” differ for persons with dementia compared to persons without dementia (examples: obtaining information, ascertaining pain severity)? | Question 1: How does communication and decision-making differ for persons with dementia compared to persons without dementia? |



3. How should presenting complaint, dementia severity, underlying frailty/vulnerability or other patient-level factors influence the ED communication strategy?
4. Are there specific medical communication strategies (such as “Teach Back” or next day telephone follow-up) that improve the process or outcomes of ED care in persons with dementia?
5. Is safe, effective, and efficient Shared Decision Making possible in persons with dementia or other cognitive impairment?
6. How frequently (and to what extent) do overlying sensory deficits (hearing impairment, vision problems) confound patient-physician communication during episodes of emergency care in persons with dementia?
7. Are members of the healthcare team (nurse, social worker, physician extenders, pharmacist, and/or physicians) who receive specific training in how to communicate with and treat dementia patients able to communicate more effectively with dementia patients and their caregivers?
8. Do patients and care partners who are unaware of or seemingly in denial of a dementia diagnosis benefit from rapid referral for a 2nd opinion to a dementia clinic (MDC or GAC)?
9. What approaches are effective and accessible (considering health literacy needs, etc.) for providing education to patients and caregivers in the ED about the diagnosis of dementia and accessible local resources in the community?
10. How can emergency medicine providers ascertain when the caregiver does or does not understand the patient’s baseline condition or vulnerability to stresses of illness or injury (or pharmacological interventions)?
11. When (and how) do emergency medicine providers seek additional details from caregiver?
12. What cognitive impairment diagnosis or findings should be communicated by emergency department providers to inpatient providers and primary care physicians regarding concerns about dementia?
13. What specific resources (home safety assessment, fall prevention, geropsych follow up, social work abuse assessment, Alzheimer’s Association, etc.) should be communicated (and how) to the patient and caregiver to improve quality of care and prevent future ED visits/hospitalizations?
14. What is the potential role(s) of Observation units (short stay visits) in assisting communication and medical decision making in dementia care? Could they reduce the number of ED visits and/or the time patients stay in the ED?
15. How can lack of cultural understanding by ED healthcare providers limit alignment of communication of options and ascertaining comprehension of options?
16. How do patients’ cultural differences influence how dementia resources may be accepted, available and/or followed and how should communication strategies differ among various populations that come to the ED to acknowledge these differences?
17. How does the presence of dementia interact with inequities in emergency medicine healthcare delivery?

Question 2: Are there specific medical communication strategies (such as “teach-back” or next day telephone follow-up) that improve the process or outcomes of ED care in persons with dementia?

Table 2. Detection/ Identification of Dementia/Cognitive Impairment PICO Research Questions

| Preliminary PICO Questions                                                                                                                                                                                                                                                                                                                                                                                                                                                                                                                                                                                                                                                                                                                                                                                                                                                                                                                                                                                                                                                                                                                                                                                                                                                                                                                                                                                                                                                                                                                                                                                                                                                                                                                                                                                                                                                                                                                                                                                                                                                                                                                                                                                                                                                                                                                                                                                                                                                                                                                                                                                                                                                                          | Final Two PICO Questions                                                                                                                                                                                                                                                                                                                                                                                                            |
|-----------------------------------------------------------------------------------------------------------------------------------------------------------------------------------------------------------------------------------------------------------------------------------------------------------------------------------------------------------------------------------------------------------------------------------------------------------------------------------------------------------------------------------------------------------------------------------------------------------------------------------------------------------------------------------------------------------------------------------------------------------------------------------------------------------------------------------------------------------------------------------------------------------------------------------------------------------------------------------------------------------------------------------------------------------------------------------------------------------------------------------------------------------------------------------------------------------------------------------------------------------------------------------------------------------------------------------------------------------------------------------------------------------------------------------------------------------------------------------------------------------------------------------------------------------------------------------------------------------------------------------------------------------------------------------------------------------------------------------------------------------------------------------------------------------------------------------------------------------------------------------------------------------------------------------------------------------------------------------------------------------------------------------------------------------------------------------------------------------------------------------------------------------------------------------------------------------------------------------------------------------------------------------------------------------------------------------------------------------------------------------------------------------------------------------------------------------------------------------------------------------------------------------------------------------------------------------------------------------------------------------------------------------------------------------------------------|-------------------------------------------------------------------------------------------------------------------------------------------------------------------------------------------------------------------------------------------------------------------------------------------------------------------------------------------------------------------------------------------------------------------------------------|
| <ol style="list-style-type: none"> <li>1. Which ED patients (diagnosed vs. undiagnosed, by age group) should be screened for cognitive impairment? (mild cognitive impairment (MCI), dementia)? Are there differences by race and ethnicity?</li> <li>2. How can the ED best identify cognitive impairment? (Best in terms of sensitivity, reliability, practicality, ease and speed of completion, etc.) Are there differences by race or ethnicity?</li> <li>3. Are there pragmatic cognitive impairment screening tools that can identify patients at risk of dementia? (Pragmatic in terms of ease of use, training, quickness to complete, etc.)</li> <li>4. Can educational programs improve detection of dementia in ED patients?</li> <li>5. Who in the ED should complete cognitive impairment screenings or assessments? (ED clinicians (physicians, nurses, etc.), non-clinicians (technicians, research assistants, etc.), patients completing self-assessments on interactive tables, etc.)</li> <li>6. Is there an objective bedside diagnostic test in the ED (i.e., plasma test, bedside EEG, etc.) to improve dementia screening accuracy? (e.g., plasma test)</li> <li>7. When in the ED care continuum should cognitive screening be done? (before, during, after the ED visit)</li> <li>8. Can the ED screen for undiagnosed dementia and refer patients for further assessment? Are there differences by race and ethnicity?</li> <li>9. How to account for language and cultural differences with diverse ED population in existing screening tools for cognitive impairment?</li> <li>10. Is the electronic health record optimized to alert healthcare providers of patients already diagnosed with dementia?</li> <li>11. Does identification of patients with dementia change ED outcomes for these patients?</li> <li>12. What outcomes are associated with undiagnosed dementia in the ED?</li> <li>13. What outcomes are associated with undetected dementia in the ED?</li> <li>14. What is the impact (positive / negative) of ED dementia screening?</li> <li>15. In cases of known dementia, does detection include assessment for patient and caregiver support?</li> <li>16. What are the ethical responsibilities of the ED clinicians to convey information about screening results versus diagnoses?</li> <li>17. What are the repercussions about reporting dementia detected in the ED and their impact on subsequent care, patient stigma or anxiety?</li> <li>18. How do symptoms of cognitive impairment without a diagnosis affect persons with dementia, particularly since diagnostic uncertainty frequently occurs in emergency medicine?</li> </ol> | <p>Question 1: How can the ED best identify cognitive impairment? (Best in terms of sensitivity, specificity, reliability, practicality, easy and speed of completion, etc.) Are there differences by race or ethnicity?</p> <p>Question 2: Are there pragmatic cognitive impairment screening tools that can identify patients at risk of dementia? (Pragmatic in terms of ease of use, training, quickness to complete, etc.)</p> |

Table 3. Care Transitions PICO Research Questions

| Preliminary PICO Questions                                                                                                                                                                                                                                                                                                                                                                                                                                                                                                                                                                                                                                                                                                                                                                                                                                                                                                                                                                                                                                                                                                                                                                                                                                                                                                                                                                                                                                                                                                                                                                                                                                                                                                                                                                                                                                                                                                                                                                                                                                                                                                                                                                                                                                                                                                                                                                                                                                                                                                 | Final Two PICO Questions                                                                                                                                                                                                                                                                                              |
|----------------------------------------------------------------------------------------------------------------------------------------------------------------------------------------------------------------------------------------------------------------------------------------------------------------------------------------------------------------------------------------------------------------------------------------------------------------------------------------------------------------------------------------------------------------------------------------------------------------------------------------------------------------------------------------------------------------------------------------------------------------------------------------------------------------------------------------------------------------------------------------------------------------------------------------------------------------------------------------------------------------------------------------------------------------------------------------------------------------------------------------------------------------------------------------------------------------------------------------------------------------------------------------------------------------------------------------------------------------------------------------------------------------------------------------------------------------------------------------------------------------------------------------------------------------------------------------------------------------------------------------------------------------------------------------------------------------------------------------------------------------------------------------------------------------------------------------------------------------------------------------------------------------------------------------------------------------------------------------------------------------------------------------------------------------------------------------------------------------------------------------------------------------------------------------------------------------------------------------------------------------------------------------------------------------------------------------------------------------------------------------------------------------------------------------------------------------------------------------------------------------------------|-----------------------------------------------------------------------------------------------------------------------------------------------------------------------------------------------------------------------------------------------------------------------------------------------------------------------|
| <ol style="list-style-type: none"> <li>1. What interventions (e.g., Electronic Medical Record, coaching, follow up; to be defined in the PICO) delivered to ED patients with impaired cognition improve ED to home transitions? (or to other settings like Skilled Nursing Facility/Nursing Home/hospice)</li> <li>2. What components of interventions delivered to ED patients with impaired cognition improve ED to home transitions?</li> <li>3. What interventions delivered to caregivers of ED patients with impaired cognition improve ED to home transitions? (or to other settings like Skilled Nursing Facility/Nursing Home/hospice)</li> <li>4. What components of interventions delivered to caregivers of ED patients with impaired cognition improve ED to home transitions.</li> <li>5. What elements of care transitions have the greatest negative impact when it comes to the care of PLWD transitioning from ED to a new place (home, facility, unit)</li> <li>6. What are patient-centered metrics of quality transitions for ED patients with impaired cognition?</li> <li>7. What predicts an ED patient with impaired cognition for needing support with care transitions / having poor outcomes from care transitions?</li> <li>8. Would prioritizing ED care for patients with impaired cognition (similar to trauma/stroke) lead to a more positive transition to home (or to other settings)?</li> <li>9. What are characteristics of the care partner that enable or impede effective care transitions?</li> <li>10. What are interventions that can be applied across multiple transitions longitudinally that improve the care of PLWD?</li> <li>11. How do PLWD, care partners, and other stakeholders define care needs and goals specific to ED transitions?</li> <li>12. Who are the essential personnel required to optimize ED care transitions for PLWD (social work, nursing, ED physician, primary care/inpatient team, care partner, others)?</li> <li>13. What decisions around care transitions should cognitively impaired patients make?</li> <li>14. How can ED providers determine if the patient has a safe living environment and, if needed, improve the living situation?</li> <li>15. What is the most effective form of follow-up for persons with dementia and at what time interval?</li> <li>16. What interventions optimize ED physician communication to inpatient and primary care providers regarding concerns related to cognition of ED patients?</li> </ol> | <p>Question 1: What interventions delivered to ED patients with impaired cognition and their care partners improve ED discharge transitions?</p> <p>Question 2: What measures of quality ED discharge transitions are important to varying groups of ED patients with impaired cognition and their care partners?</p> |

Table 4. Optimal ED Practices PICO Research Questions

| Preliminary PICO Questions                                                                                                                                                                                                                                                                                                                                                                                                                                                                                                                                                                                                                                                                                                                                                                                                                                                                                                                                                                                                                                                                                                                                                                                                                                                                                                                                                                                                                                                                                                                                                                                                                                                                                                                                                                                                                                                                                                                                                                                                                                                                                                                                                                                                                                                                                                                                                                                                                                                                                                                                                                                                                                                                                                                                                                                                                                                                                                                                                                                                                                                                                                                                                                                                                                                                    | Final Two PICO Questions                                                                                                                                                                                                                                                                  |
|-----------------------------------------------------------------------------------------------------------------------------------------------------------------------------------------------------------------------------------------------------------------------------------------------------------------------------------------------------------------------------------------------------------------------------------------------------------------------------------------------------------------------------------------------------------------------------------------------------------------------------------------------------------------------------------------------------------------------------------------------------------------------------------------------------------------------------------------------------------------------------------------------------------------------------------------------------------------------------------------------------------------------------------------------------------------------------------------------------------------------------------------------------------------------------------------------------------------------------------------------------------------------------------------------------------------------------------------------------------------------------------------------------------------------------------------------------------------------------------------------------------------------------------------------------------------------------------------------------------------------------------------------------------------------------------------------------------------------------------------------------------------------------------------------------------------------------------------------------------------------------------------------------------------------------------------------------------------------------------------------------------------------------------------------------------------------------------------------------------------------------------------------------------------------------------------------------------------------------------------------------------------------------------------------------------------------------------------------------------------------------------------------------------------------------------------------------------------------------------------------------------------------------------------------------------------------------------------------------------------------------------------------------------------------------------------------------------------------------------------------------------------------------------------------------------------------------------------------------------------------------------------------------------------------------------------------------------------------------------------------------------------------------------------------------------------------------------------------------------------------------------------------------------------------------------------------------------------------------------------------------------------------------------------------|-------------------------------------------------------------------------------------------------------------------------------------------------------------------------------------------------------------------------------------------------------------------------------------------|
| <ol style="list-style-type: none"> <li>1. How do emergency care needs differ for PLWD differ from other patients in the ED?</li> <li>2. What components of ED care improve patient-centered outcomes for PLWD?</li> <li>3. Possible components may include: ED environment, patient length of stay in the ED, evaluation and identification of delirium, assessment and treatment of pain, management of agitation, scheduling outpatient follow-up, etc.</li> <li>4. What patient-centered metrics best measure the impact of ED interventions for persons with dementia?</li> <li>5. Does optimal ED care prevent incident delirium for PLWD in the ED?</li> <li>6. How does severity of dementia and presence of other health issues impact the optimal delivery of ED care for PLWD?</li> <li>7. How do social determinants of health such as race, ethnicity, wealth, and access to medical care impact delivery of optimal ED care for PLWD?</li> <li>8. How frequently are PLWD evaluated for delirium in the ED?</li> <li>9. How accurately do ED clinicians identify delirium in PLWD in usual practice?</li> <li>10. What is the accuracy of delirium identification tools for PLWD in the ED?</li> <li>11. How can rapidly progressive dementia be identified in the ED? Should patients with rapidly progressive dementia be admitted for expedited workup?</li> <li>12. What are the best pharmacological and non-pharmacological strategies to manage agitation and other behavioral concerns for PLWD in the ED?</li> <li>13. How adequately is pain controlled in the ED for PLWD?</li> <li>14. How frequently are alternative measures for pain assessment such as the Behavioral Pain Scale, or Critical Care Pain Observation Tool used in the ED for PLWD?</li> <li>15. How frequently are alternative measures for pain assessment such as the Behavioral Pain Scale or Critical Care Pain Observation Tool taught to emergency clinicians?</li> <li>16. How accurate are screening techniques which are commonly used ED for PLWD? Commonly used screening techniques may include techniques to identify delirium, pain, depression, and abuse.</li> <li>17. What are the knowledge and training gaps for emergency clinicians and nonclinical staff regarding optimal care of PLWD? Non-clinical staff may include personnel such as security, and registration.</li> <li>18. How can emergency clinicians best interact with care partners to provide optimal ED care for PLWD?</li> <li>19. How does care partner involvement impact ED care for PLWD? Are these impacts different when care partners are present compared to paid caregivers?</li> <li>20. What are the impacts of pragmatic approaches to providing acute unscheduled care such as home care, community paramedicine, telemedicine, or 3D telemedicine on patient-centered outcomes for PLWD?</li> <li>21. How do emergency clinicians best connect PLWD with community resources?</li> <li>22. When concern for dementia or cognitive impairment is identified in the ED, how do clinicians address concerns with patient autonomy and capacity? Should these concerns be reported to anyone? For example, the patient's family, primary care clinician, or adult protective services.</li> </ol> | <p><b>Question 1:</b> <i>What components of emergency department care improve patient-centered outcomes for persons with dementia?</i></p> <p><b>Question 2:</b> <i>How do emergency care needs for persons with dementia differ from other patients in the emergency department?</i></p> |

### Medical Librarian Collaboration

Medical librarians from each workgroup leads institution working together developed a standardized core search strategy for the workgroups, as well as topic specific modifications for the scoping reviews. Prior studies have demonstrated this collaboration style creates higher quality search strategies and minimizes review bias.<sup>24-26</sup> To confirm the search strategies developed would capture the articles sought after, exemplar articles were identified. The searches were reviewed to ensure inclusion of these articles.

The librarians worked together to identify relevant bibliographic databases to maximize capture of relevant articles while limiting duplication. Databases searched included Medline (Ovid), Embase, Cochrane Central Register of Controlled Trials, CINAHL, PsychINFO, PubMed Central, Web of Science, and ProQuest Theses and Dissertations. For a list of databases used by the Workgroups, see Table 5. Databases searched by Workgroups. Each site librarian conducted the literature search, identified article duplication, and uploaded the results to Covidence, a systematic review software (Veritas Health Innovation, Melbourne, Australia. Available at [www.covidence.org](http://www.covidence.org)). The scoping reviews for each group are registered on Open Science Framework.<sup>27-30</sup>

Table 5. Databases searched by Workgroups

| Database searched | Workgroup |               |           |             |
|-------------------|-----------|---------------|-----------|-------------|
|                   | Detection | Communication | Practices | Transitions |
| MEDLINE (Ovid)    | X         | X             | X         | X           |
| Embase            | X         | X             | X         | X           |

|                                                |   |   |   |   |
|------------------------------------------------|---|---|---|---|
| Cochrane Central Register of Controlled Trials | X | X | X | X |
| CINAHL (Ebsco)                                 | X | X | X | X |
| PsycINFO (Ebsco)                               | X | X | X |   |
| PubMed Central                                 | X | X | X | X |
| Web of Science                                 | X | X | X | X |
| ProQuest Theses & Dissertations                |   | X |   |   |

The workgroup lead and a trained research associate independently screened the titles and abstracts of all articles uploaded into Covidence for relevance. Articles that were obviously irrelevant to the study questions were excluded. The reviewers adjudicated any disagreements. If they did not agree, a third-party reviewer made the final decision. The full text of articles identified as potentially relevant were then reviewed in the same manner. Data were abstracted from the articles deemed relevant. To ensure consistency in the conduct of the scoping reviews, workgroup leads and project team members discussed progress at the biweekly meetings and communicated frequently through email correspondence.

#### Phase 1: GEAR 2.0 ADC Consensus Conference

The culmination of the scoping review process resulted in presentations of these synthesized results from each domain at a two-day consensus conference of the full GEAR 2.0 ADC Taskforce in September 2021. At the conference, Taskforce members were mixed and distributed across smaller groups to discuss the findings of the scoping reviews. The goal of

1  
2  
3 these small groups was to provide stakeholder insight and recommendations on the current  
4  
5 knowledge base and to provide suggestions for future research and pilot grants. After small  
6  
7 group discussion, there was an opportunity for shared debrief of these breakout sessions. Each  
8  
9 workgroup then incorporated the feedback and themes heard from the small group discussion  
10  
11 to prepare five research priorities, based on the scoping review results and transdisciplinary  
12  
13 stakeholder recommendations. The full taskforce then ranked these research priorities using an  
14  
15 online survey (Pollevywhere.com). Taskforce members unable to attend the conference were  
16  
17 asked to vote asynchronously, for 100% participation by all Taskforce and Health Equity  
18  
19 Advisory Board members. Results of each scoping reviews, their search methodology, and  
20  
21 ranked research priorities will be published separately.  
22  
23  
24  
25  
26  
27  
28  
29

30 Copies of the GEAR and GEAR 2.0 ADC Consensus Conference Summaries are available on the  
31  
32 GEAR website: <https://gearnetwork.org/manuscripts-publications/>  
33  
34  
35  
36

#### 37 Phase 2: GEAR 2.0 ADC Pilot funding

38  
39 During the second phase, pilot funding opportunities will be made available to  
40  
41 investigators. Proposals for pilot studies must address the research priorities recommended by  
42  
43 the GEAR 2.0 ADC Taskforce and HEAB members from the GEAR 2.0 ADC Consensus  
44  
45 Conference. During this phase, the GEAR 2.0 ADC Cores will become active and support early  
46  
47 research addressing research gaps and priorities recommended by the GEAR 2.0 ADC Taskforce.  
48  
49 In addition to pilot funding, the Research Core, Data and Informatics Core, and Dissemination  
50  
51 and Implementation Core will provide guidance to pilot awardees as they conduct their studies,  
52  
53  
54  
55  
56  
57  
58  
59  
60

1  
2  
3 including training sessions to enhance and increase transdisciplinary collaboration within and  
4  
5 across the GEAR 2.0 ADC Network. These will be held as virtual training webinars, conferences  
6  
7 and office hours, and bi-monthly research progress meetings where awardees will have the  
8  
9 opportunity to share their study progress with each other.  
10  
11  
12  
13  
14

15 GEAR 2.0 ADC pilot funding opportunities can be found on the GEAR website:

16  
17 <https://gearnetwork.org/grants-and-funding-opportunities/>  
18  
19  
20  
21

## 22 **DISCUSSION**

23  
24  
25 In this paper we present a framework establishing an infrastructure to advance geriatric  
26  
27 emergency medicine research. The value of this framework, and more importantly the  
28  
29 representation of key stakeholders, is unique and critical to guide optimally future research  
30  
31 addressing practice gaps that matter to all those engaged in all facets of emergency care for  
32  
33 PLWD and their care partners. It differs from other previous agenda setting processes directed  
34  
35 at geriatric emergency care<sup>31-34</sup> in the following ways: 1. The inclusion of stakeholder  
36  
37 participation as part of the scoping review and consensus process to identify research gaps and  
38  
39 priorities, 2. Cross coordination with medical librarians of scoping review searches, 3. Creation  
40  
41 of a Health Equity Advisory Board to ensure meaningful inclusion of diverse populations in  
42  
43 studies focused on the emergency care of people living with dementia, and 4. Provision of pilot  
44  
45 funding to initiate research in the recommended consensus research priorities.  
46  
47  
48  
49  
50

51  
52 A significant strength of the GEAR Network approach is the inclusion of patients,  
53  
54 individuals that use the healthcare system, and care partners as part of the process. It is a  
55  
56  
57  
58  
59  
60



1  
2  
3 priority of the GEAR Network to include their experiences and perspectives and to learn what  
4  
5 matters to them about the emergency care they receive. Further, GEAR Network strives to  
6  
7 share with these stakeholders' reasons why health and medical care occurs the way it does, to  
8  
9 enable them to engage meaningfully, and to integrate their critical feedback and  
10  
11 recommendations on the topics throughout the entire GEAR Network approach. For GEAR 2.0  
12  
13 ADC, this has even greater relevance coupled with challenges faced by PLWD, all of whom have  
14  
15 cognitive impairment with varying degrees of severity. While the PLWD who participate in  
16  
17 GEAR 2.0 ADC are in the early stages of dementia and remain high functioning, they, along with  
18  
19 care partners and many other stakeholders who are not researchers nor clinicians, are not as  
20  
21 familiar with taskforce or agenda setting research processes.  
22  
23  
24  
25  
26

27  
28 Preparatory background steps by the GEAR 2.0 ADC Project Team with these non-  
29  
30 research and non-clinical stakeholders are necessary to support their full engagement.  
31  
32 Following the Empowering Partnership principals of and working with the Livewell Dementia  
33  
34 Specialists organization,<sup>35</sup> GEAR 2.0 ADC set up several working sessions with the non-  
35  
36 researchers and non-clinicians Taskforce members, including separate preparatory video  
37  
38 conferences, providing printed folders of all conference materials in advance of the meeting,  
39  
40 and providing opportunities for feedback about conference format and to address any  
41  
42 questions they might have prior to the conference. There was also an additional debrief  
43  
44 session after the GEAR 2.0 ADC Consensus Conference to gather additional suggestions and  
45  
46 feedback about the conference from these individuals. When working with PLWD with early to  
47  
48 middle stage dementia, it is important to recognize there may be varying degrees of cognitive  
49  
50 function that may impact tasks and activities. For example, the survey ranking many potential  
51  
52  
53  
54  
55  
56  
57  
58  
59  
60

1  
2  
3 questions initially proposed by workgroups required significant mental focus to complete for  
4  
5 individuals of all levels of cognitive function. This was even more challenging for some PLWD  
6  
7 members who found the survey format difficult to comprehend fully. To incorporate their  
8  
9 input, once the top four choices were identified, their thoughts on each were discussed  
10  
11 separately with them. Concurrently, other PLWD members did not express any difficulty with  
12  
13 the survey. It is important that researchers consider the potential limitations of PLWD in  
14  
15 research engagement and find ways to enable their full participation.  
16  
17  
18

19  
20 Another innovative feature of the scoping review process in GEAR 2.0 ADC was the  
21  
22 collaboration of research librarians from four different institution sites and their inclusion early  
23  
24 in PICO question development. Each workgroup's assigned librarian participated in meetings  
25  
26 when PICO question development was occurring. This provided unique insight and  
27  
28 understanding as to the group's thought process that allowed the librarian to craft the  
29  
30 appropriate search strategy. It was decided that the four librarians would develop a  
31  
32 standardized search for the elements consistent between the groups and then tailor the  
33  
34 remaining elements for their specific groups. By cooperating on core search development, the  
35  
36 librarians were quickly able to develop a highly effective search strategy, minimizing bias.<sup>26</sup> The  
37  
38 standardization of the common elements helped ensure consistency in articles identified  
39  
40 between groups.<sup>25</sup>  
41  
42  
43  
44  
45  
46

47 As part of its mission, GEAR 2.0 ADC has also prioritized addressing equity through  
48  
49 diversity and inclusion in its research agenda. The concern is multifactorial as it includes the  
50  
51 diversity and composition of the workgroups, the defining of the questions, and  
52  
53 implementation in the future pilot grants to be offered by GEAR 2.0 ADC. Despite continuous  
54  
55  
56  
57  
58  
59  
60

1  
2  
3 efforts to increase diversity of the taskforce and while equally split in member gender, the  
4  
5 workgroups and PLWD representatives are overwhelmingly Caucasian. This is a challenge for  
6  
7 many organizations attempting to increase diversity in representation and health equity with  
8  
9 research, especially for PLWD. Within the workgroups, Diversity Equity and Inclusion was  
10  
11 discussed in terms of the patients seen in the ED. The discussions included race, gender,  
12  
13 ethnic/religious affiliation, sex identification, along with the impact of social determinants of  
14  
15 health. Identifying additional workgroup members whose participation would broaden the  
16  
17 groups' diversity would have taken more time than the groups had, thus the decision was made  
18  
19 to create a "Health Equity Advisory Board"(HEAB) of members from underrepresented and  
20  
21 disenfranchised groups to review and provide input on the output of the workgroups and GEAR  
22  
23 2.0 ADC processes. The GEAR 2.0 ADC PIs along with the workgroup leads have developed a  
24  
25 framework for the board that includes quarterly meetings that preview consensus conference  
26  
27 materials to incorporate feedback before the conference and sharing materials and will involve  
28  
29 the HEAB when selecting GEAR 2.0 ADC pilot studies to fund.  
30  
31  
32  
33  
34  
35  
36

37 Finally, perhaps the most significant and unique feature of the GEAR Network research  
38  
39 infrastructure is its provision of pilot funding for the research priorities generated by its  
40  
41 consensus stakeholder process. Support is directed to build preliminary research and evidence  
42  
43 in clinical and research gaps identified by scoping review processes that were voted by  
44  
45 transdisciplinary members of the field and by patients and their care partners. This novel  
46  
47 approach targets funding for stated and ranked priorities by "putting money where our mouth  
48  
49 is." It is hoped that the funding from these pilot studies will foster interest and research in  
50  
51 needed areas of geriatric- and dementia-related emergency care, increase and diversify the  
52  
53  
54  
55  
56  
57  
58  
59  
60

1  
2  
3 pool and foci of researchers, and generate preliminary evidence and data for larger scale study  
4  
5 proposals that are critically needed to advance the science of geriatric emergency care.  
6  
7

8 In summary, the GEAR Network approach provides a framework and systematic  
9  
10 approach to review the literature for research and practice gaps. Further, the GEAR Network  
11  
12 approach gives insight as to how to engage key stakeholders from all facets of caring for older  
13  
14 adults and persons living with dementia to define and state what research priorities matter.  
15  
16 This approach may be used by other disciplines, professions, and specialties to advance  
17  
18 research priorities in aging.  
19  
20  
21  
22  
23  
24  
25  
26  
27  
28  
29  
30  
31  
32  
33  
34  
35  
36  
37  
38  
39  
40  
41  
42  
43  
44  
45  
46  
47  
48  
49  
50  
51  
52  
53  
54  
55  
56  
57  
58  
59  
60

1  
2  
3 Statements/Declarations  
4

5  
6 *Authors' contributions:*  
7

8 All authors read and approved the final manuscript.  
9

10 CRC conceived the approach, provided methodological guidance, oversaw the implementation  
11 and operations of the approach, and provided review and edits in the writing\_\_\_\_  
12  
13

14 SD organized the implementation and operations of the approach and was a major contributor  
15 in writing  
16

17  
18 JD organized the implementation and operations of the research approach and was a major  
19 contributor in writing the manuscript.  
20

21 AG organized the implementation and operations of the research approach and was a major  
22 contributor in writing the manuscript.  
23  
24

25 LH organized the implementation and operations of the research approach and was a major  
26 contributor in writing the manuscript.  
27  
28

29 UH secured funding, conceived the approach, organized the infrastructure and partnerships,  
30 organized the implementation and operations of the approach, was a major contributor in  
31 writing and overseeing the manuscript.  
32  
33

34 JL organized the implementation and operations of the research approach and was a major  
35 contributor in writing the manuscript.  
36  
37

38 AN organized the implementation and operations of the research approach and was a major  
39 contributor in writing the manuscript.  
40  
41

42 MNS secured funding, conceived the approach, organized the infrastructure and partnerships,  
43 organized the implementation and operations of the approach, was a major contributor in  
44 writing and overseeing the manuscript.  
45

46 ZT organized the implementation and operations of the research approach and was a major  
47 contributor in writing the manuscript.  
48  
49

---

50  
51 *Funding Statement:*

52 This work and the GEAR Networks are funded and supported by the following organizations,  
53 each of which fosters and supports the development of research infrastructures to promote  
54 studies that address the research and clinical gaps in the aging process and related health fields  
55 through: (1) research performed and proposed through contracts; (2) a program of research  
56  
57  
58  
59  
60

1  
2  
3 grants and individual and institutional pilot awards; (3) cooperation and collaboration with  
4 other Departmental agencies, voluntary organizations, and other institutions; and (4) collection  
5 and dissemination of the findings of aging and dementia related studies.  
6  
7

8 National Institute on Aging [R33 AG058926 (Hwang)]  
9

10 National Institute on Aging [R61 AG069822 (Hwang, Shah)]  
11

12  
13 Emergency Medicine Foundation [N/A]  
14

15 The Gary and Mary West Health Institute [The Geriatric Emergency Department Collaborative]  
16

17  
18 The John A. Hartford Foundation [The Geriatric Emergency Department Collaborative]  
19  
20  
21  
22

---

23  
24 *Competing interest statements:*

25 CRC – none

26 SD – none

27 JD – none

28 AG – none

29 LH – none

30 UH – none

31 JL – none

32 AN – none

33 MS – none

34 ZT – none  
35  
36  
37  
38  
39  
40  
41  
42  
43  
44  
45  
46  
47  
48  
49  
50  
51  
52  
53  
54  
55  
56  
57  
58  
59  
60

## REFERENCES:

1. National Center for Health Statistics. Health, United States, 2015: With special feature on racial and ethnic disparities. Hyattsville, MD: U.S. Centers for Disease Control & Prevention; 2015.
2. Tang N, Stein J, Hsia RY, Maselli JH, Gonzales R. Trends and characteristics of US emergency department visits, 1997-2007. *JAMA*. 2010;304:664-670.
3. Ukkonen M, Jämsen E, Zeitlin R, Pauniah SL. Emergency department visits in older patients: a population-based survey. *BMC Emerg Med*. 2019;19:20.
4. Hwang U, Morrison RS. The Geriatric Emergency Department. *J Am Geriatr Soc*. 2007;55:1873-1876.
5. Hwang U, Shah MN, Han JH, Carpenter CR, Siu AL, Adams J. Transforming Emergency Care for Older Adults. *Health Aff*. 2013;32:2116-2121.
6. Geriatric emergency department guidelines. *Ann Emerg Med*. 2014;63:e7-25.
7. Schumacher JG, Hirshon JM, Magidson P, Chrisman M, Hogan T. Tracking the Rise of Geriatric Emergency Departments in the United States. *J Appl Gerontol*. 2020;39:871-879.
8. Kennedy M, Lesser A, Israni J, et al. Reach and Adoption of a Geriatric Emergency Department Accreditation Program in the United States. *Ann Emerg Med*. 2021.
9. Wilber ST. Geriatric Emergency Medicine. In: Solomon D, LoCicero J, Rosenthal R, eds. *New Frontiers in Geriatric Research*. New York, NY: American Geriatric Society; 2004:53-83.
10. Carpenter CR, Banerjee J, Keyes D, et al. Accuracy of Dementia Screening Instruments in Emergency Medicine: A Diagnostic Meta-analysis. *Acad Emerg Med*. 2019;26:226-245.
11. Hogan TM, Olade TO, Carpenter CR. A profile of acute care in an aging America: Snowball sample identification and characterization of United States Geriatric Emergency Departments in 2013. *Acad Emerg Med*. 2014;21:337-346.
12. GEAR: Geriatric Emergency care Applied Research. Vol 20212021.
13. Kayser J, Morrow-Howell N, Rosen TE, et al. Research priorities for elder abuse screening and intervention: A Geriatric Emergency Care Applied Research (GEAR) network scoping review and consensus statement. *J Elder Abuse Negl*. 2021;33:123-144.
14. Carpenter CR, Hammouda N, Linton EA, et al. Delirium Prevention, Detection, and Treatment in Emergency Medicine Settings: A Geriatric Emergency Care Applied Research (GEAR) Network Scoping Review and Consensus Statement. *Acad Emerg Med*. 2021;28:19-35.
15. Hammouda N, Carpenter CR, Hung WW, et al. Moving the needle on fall prevention: A Geriatric Emergency Care Applied Research (GEAR) Network scoping review and consensus statement. *Acad Emerg Med*. 2021.
16. Gettel CJ, Voils CI, Bristol AA, et al. Care transitions and social needs: A Geriatric Emergency care Applied Research (GEAR) Network scoping review and consensus statement. *Acad Emerg Med*. 2021.
17. Carpenter CR, McFarland F, Avidan M, et al. Impact of Cognitive Impairment Across Specialties: Summary of a Report From the U13 Conference Series. *J Am Geriatr Soc*. 2019;67:2011-2017.
18. Health Disparities Framework. *National Institute on Aging*. Vol 20212021.
19. Health Equity Team: NIA IMPACT Collaboratory; 2021.
20. Sabir M, Breckman R, Meador R, Wethington E, Reid MC, Pillemer K. The CITRA research-practice consensus-workshop model: exploring a new method of research translation in aging. *Gerontologist*. 2006;46:833-839.
21. Schardt C, Adams MB, Owens T, Keitz S, Fontelo P. Utilization of the PICO framework to improve searching PubMed for clinical questions. *BMC Med Inform Decis Mak*. 2007;7:16.
22. Tricco AC, Lillie E, Zarin W, et al. PRISMA Extension for Scoping Reviews (PRISMA-ScR): Checklist and Explanation. *Ann Intern Med*. 2018;169:467-473.

- 1
  - 2
  - 3
  - 4
  - 5
  - 6
  - 7
  - 8
  - 9
  - 10
  - 11
  - 12
  - 13
  - 14
  - 15
  - 16
  - 17
  - 18
  - 19
  - 20
  - 21
  - 22
  - 23
  - 24
  - 25
  - 26
  - 27
  - 28
  - 29
  - 30
  - 31
  - 32
  - 33
  - 34
  - 35
  - 36
  - 37
  - 38
  - 39
  - 40
  - 41
  - 42
  - 43
  - 44
  - 45
  - 46
  - 47
  - 48
  - 49
  - 50
  - 51
  - 52
  - 53
  - 54
  - 55
  - 56
  - 57
  - 58
  - 59
  - 60
23. Chambers D, Simpson L, Hill-Briggs F, et al. Proceedings of the 8th Annual Conference on the Science of Dissemination and Implementation : Washington, DC, USA. 14-15 December 2015. *Implement Sci.* 2016;11 Suppl 2:100.
24. Peters MD, Godfrey CM, Khalil H, McInerney P, Parker D, Soares CB. Guidance for conducting systematic scoping reviews. *Int J Evid Based Healthc.* 2015;13:141-146.
25. Rethlefsen ML, Farrell AM, Osterhaus Trzasko LC, Brigham TJ. Librarian co-authors correlated with higher quality reported search strategies in general internal medicine systematic reviews. *J Clin Epidemiol.* 2015;68:617-626.
26. Aamodt M, Huurdeman H, Strømme H. Librarian Co-Authored Systematic Reviews are Associated with Lower Risk of Bias Compared to Systematic Reviews with Acknowledgement of Librarians or No Participation by Librarians. *Evidence Based Library and Information Practice.* 2019;14:103-127.
27. Brackett AL, Shah MN. Geriatric Emergency Care Applied Research Network 2.0 – Advancing Dementia Care (GEAR 2.0 ADC) - Care Transitions Work Group. June 30 ed: Open Science Framework; 2021.
28. Brackett AL, Carpenter CR. Geriatric Emergency Care Applied Research Network 2.0 – Advancing Dementia Care (GEAR 2.0 ADC) – Communication & Decision Making Workgroup. *Open Science Framework.* Vol 2021. June 30 ed: Open Science Framework; 2021.
29. Brackett AL, Hwang U. Geriatric Emergency Care Applied Research Network 2.0 – Advancing Dementia Care (GEAR 2.0 ADC) - Detection and Identification Work Group. June 30 ed: Open Science Framework; 2021.
30. Brackett AL, Dresden S. Geriatric Emergency Care Applied Research Network 2.0 – Advancing Dementia Care (GEAR 2.0 ADC) – Emergency Department Practices Workgroup. June 30 ed: Open Science Framework; 2021.
31. Wilber ST. Geriatric Emergency Medicine. In: Solomon D, LoCicero J, Rosenthal R, eds. *New Frontiers in Geriatric Research.* New York, NY: American Geriatrics Society; 2004:53-83.
32. Carpenter CR, Gerson LW. Geriatric Emergency Medicine. In: Solomon D, LoCicero J, Rosenthal R, eds. *New Frontiers in Geriatric Research.* New York, NY: American Geriatrics Society; 2008.
33. Carpenter CR, Heard K, Wilber S, et al. Research priorities for high-quality geriatric emergency care: medication management, screening, and prevention and functional assessment. *Acad Emerg Med.* 2011;18:644-654.
34. Carpenter CR, Shah MN, Hustey FM, Heard K, Gerson LW, Miller DK. High yield research opportunities in geriatric emergency medicine: prehospital care, delirium, adverse drug events, and falls. *J Gerontol A Biol Sci Med Sci.* 2011;66:775-783.
35. Empowering Partnerships: LiveWell Dementia Specialists; 2019.



1  
2  
3  
4  
5  
6  
7  
8  
9  
10  
11  
12  
13  
14  
15  
16  
17  
18  
19  
20  
21  
22  
23  
24  
25  
26  
27  
28  
29  
30  
31  
32  
33  
34  
35  
36  
37  
38  
39  
40  
41  
42  
43  
44  
45  
46  
47  
48  
49  
50  
51  
52  
53  
54  
55  
56  
57  
58  
59  
60

Figure Legends

Figure 1. GEAR 2.0 ADC Organizational Structure

Figure 2. GEAR 2.0 ADC Taskforce Composition

For peer review only

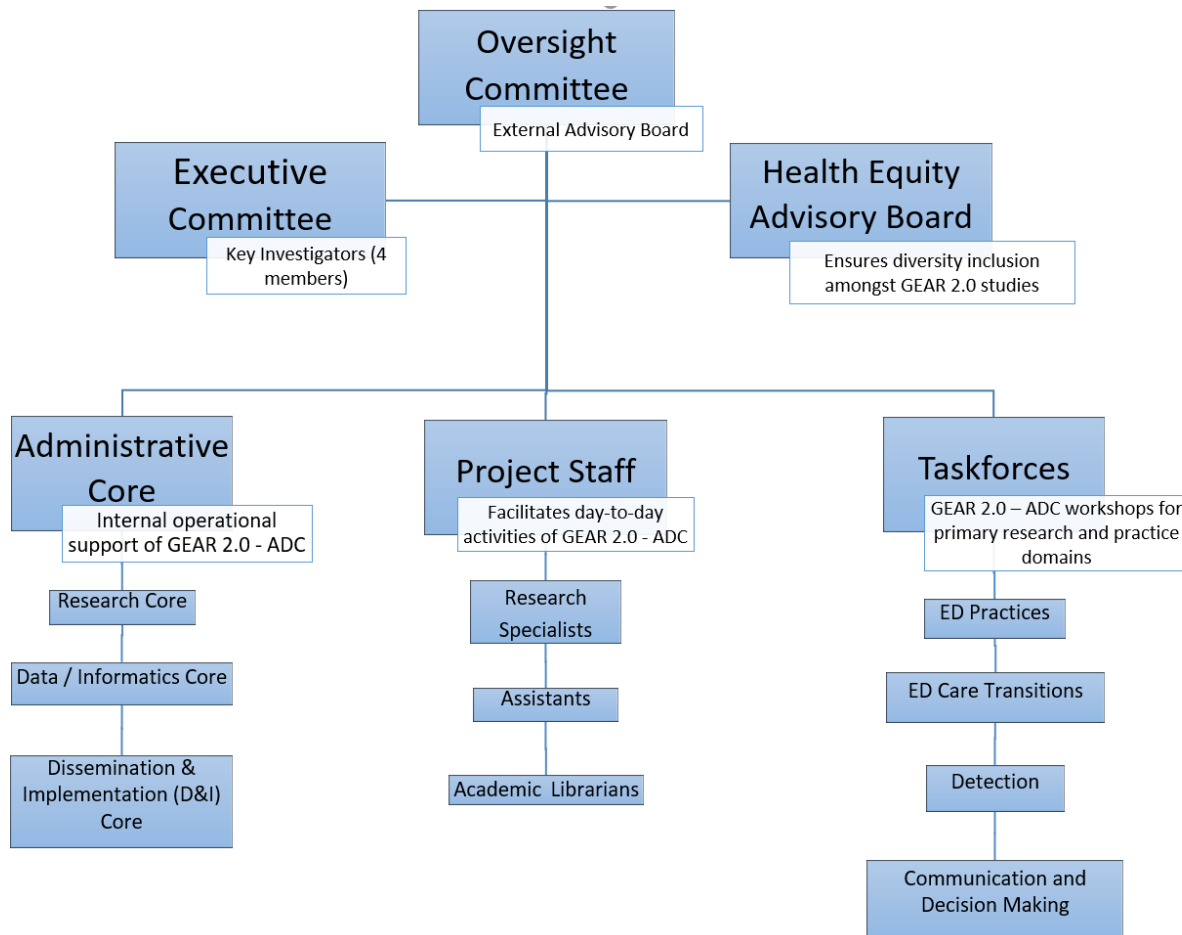

ew only

1  
2  
3  
4  
5  
6  
7  
8  
9  
10  
11  
12  
13  
14  
15  
16  
17  
18  
19  
20  
21  
22  
23  
24  
25  
26  
27  
28  
29  
30  
31  
32  
33  
34  
35  
36  
37  
38  
39  
40  
41  
42  
43  
44  
45  
46  
47  
48  
49  
50  
51  
52  
53  
54  
55  
56  
57  
58  
59  
60

# GEAR 2.0 Stakeholders

- Advocate
- Care Partner
- Educator
- Emergency Physician
- Funder
- Geriatric Psychiatrist
- Geriatrician
- Neuropsychologist
- Nursing
- Pharmacist
- Physical Therapist
- Person Living With Dementia
- Psychologist
- Researcher
- Student

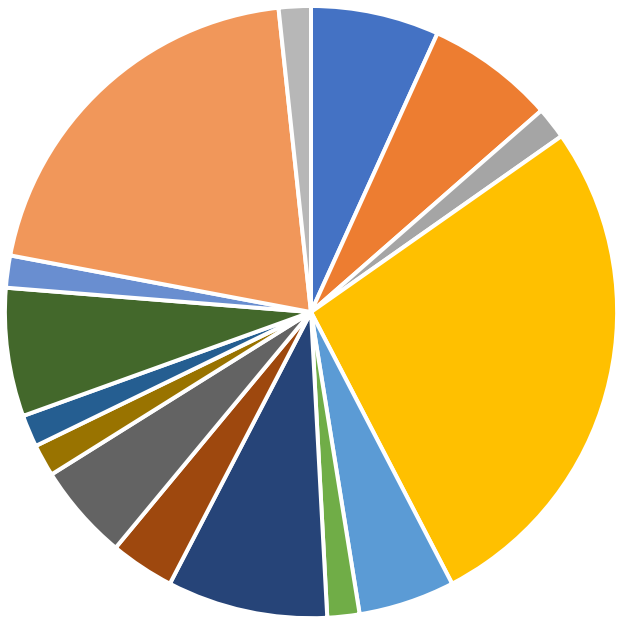

review only

## Preferred Reporting Items for Systematic reviews and Meta-Analyses extension for Scoping Reviews (PRISMA-ScR) Checklist

| SECTION                                               | ITEM | PRISMA-ScR CHECKLIST ITEM                                                                                                                                                                                                                                                                                  | REPORTED ON PAGE # |
|-------------------------------------------------------|------|------------------------------------------------------------------------------------------------------------------------------------------------------------------------------------------------------------------------------------------------------------------------------------------------------------|--------------------|
| <b>TITLE</b>                                          |      |                                                                                                                                                                                                                                                                                                            |                    |
| Title                                                 | 1    | Identify the report as a scoping review.                                                                                                                                                                                                                                                                   | 1                  |
| <b>ABSTRACT</b>                                       |      |                                                                                                                                                                                                                                                                                                            |                    |
| Structured summary                                    | 2    | Provide a structured summary that includes (as applicable): background, objectives, eligibility criteria, sources of evidence, charting methods, results, and conclusions that relate to the review questions and objectives.                                                                              | 3-4                |
| <b>6-7INTRODUCTION</b>                                |      |                                                                                                                                                                                                                                                                                                            |                    |
| Rationale                                             | 3    | Describe the rationale for the review in the context of what is already known. Explain why the review questions/objectives lend themselves to a scoping review approach.                                                                                                                                   | 6-7                |
| Objectives                                            | 4    | Provide an explicit statement of the questions and objectives being addressed with reference to their key elements (e.g., population or participants, concepts, and context) or other relevant key elements used to conceptualize the review questions and/or objectives.                                  | 6                  |
| <b>METHODS</b>                                        |      |                                                                                                                                                                                                                                                                                                            |                    |
| Protocol and registration                             | 5    | Indicate whether a review protocol exists; state if and where it can be accessed (e.g., a Web address); and if available, provide registration information, including the registration number.                                                                                                             | 5                  |
| Eligibility criteria                                  | 6    | Specify characteristics of the sources of evidence used as eligibility criteria (e.g., years considered, language, and publication status), and provide a rationale.                                                                                                                                       | 13-15              |
| Information sources*                                  | 7    | Describe all information sources in the search (e.g., databases with dates of coverage and contact with authors to identify additional sources), as well as the date the most recent search was executed.                                                                                                  | 14                 |
| Search                                                | 8    | Present the full electronic search strategy for at least 1 database, including any limits used, such that it could be repeated.                                                                                                                                                                            | 14                 |
| Selection of sources of evidence†                     | 9    | State the process for selecting sources of evidence (i.e., screening and eligibility) included in the scoping review.                                                                                                                                                                                      | 14                 |
| Data charting process‡                                | 10   | Describe the methods of charting data from the included sources of evidence (e.g., calibrated forms or forms that have been tested by the team before their use, and whether data charting was done independently or in duplicate) and any processes for obtaining and confirming data from investigators. | 15                 |
| Data items                                            | 11   | List and define all variables for which data were sought and any assumptions and simplifications made.                                                                                                                                                                                                     | 15                 |
| Critical appraisal of individual sources of evidence§ | 12   | If done, provide a rationale for conducting a critical appraisal of included sources of evidence; describe the methods used and how this information was used in any data synthesis (if appropriate).                                                                                                      | n/a                |

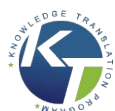

| SECTION                                       | ITEM | PRISMA-ScR CHECKLIST ITEM                                                                                                                                                                       | REPORTED ON PAGE # |
|-----------------------------------------------|------|-------------------------------------------------------------------------------------------------------------------------------------------------------------------------------------------------|--------------------|
| Synthesis of results                          | 13   | Describe the methods of handling and summarizing the data that were charted.                                                                                                                    | n/a                |
| <b>RESULTS</b>                                |      |                                                                                                                                                                                                 |                    |
| Selection of sources of evidence              | 14   | Give numbers of sources of evidence screened, assessed for eligibility, and included in the review, with reasons for exclusions at each stage, ideally using a flow diagram.                    | n/a                |
| Characteristics of sources of evidence        | 15   | For each source of evidence, present characteristics for which data were charted and provide the citations.                                                                                     | n/a                |
| Critical appraisal within sources of evidence | 16   | If done, present data on critical appraisal of included sources of evidence (see item 12).                                                                                                      | n/a                |
| Results of individual sources of evidence     | 17   | For each included source of evidence, present the relevant data that were charted that relate to the review questions and objectives.                                                           | n/a                |
| Synthesis of results                          | 18   | Summarize and/or present the charting results as they relate to the review questions and objectives.                                                                                            | n/a                |
| <b>DISCUSSION</b>                             |      |                                                                                                                                                                                                 |                    |
| Summary of evidence                           | 19   | Summarize the main results (including an overview of concepts, themes, and types of evidence available), link to the review questions and objectives, and consider the relevance to key groups. | n/a                |
| Limitations                                   | 20   | Discuss the limitations of the scoping review process.                                                                                                                                          | n/a                |
| Conclusions                                   | 21   | Provide a general interpretation of the results with respect to the review questions and objectives, as well as potential implications and/or next steps.                                       | n/a                |
| <b>FUNDING</b>                                |      |                                                                                                                                                                                                 |                    |
| Funding                                       | 22   | Describe sources of funding for the included sources of evidence, as well as sources of funding for the scoping review. Describe the role of the funders of the scoping review.                 | 22-23              |

JBI = Joanna Briggs Institute; PRISMA-ScR = Preferred Reporting Items for Systematic reviews and Meta-Analyses extension for Scoping Reviews.

\* Where *sources of evidence* (see second footnote) are compiled from, such as bibliographic databases, social media platforms, and Web sites.

† A more inclusive/heterogeneous term used to account for the different types of evidence or data sources (e.g., quantitative and/or qualitative research, expert opinion, and policy documents) that may be eligible in a scoping review as opposed to only studies. This is not to be confused with *information sources* (see first footnote).

‡ The frameworks by Arksey and O'Malley (6) and Levac and colleagues (7) and the JBI guidance (4, 5) refer to the process of data extraction in a scoping review as data charting.

§ The process of systematically examining research evidence to assess its validity, results, and relevance before using it to inform a decision. This term is used for items 12 and 19 instead of "risk of bias" (which is more applicable to systematic reviews of interventions) to include and acknowledge the various sources of evidence that may be used in a scoping review (e.g., quantitative and/or qualitative research, expert opinion, and policy document).

From: Tricco AC, Lillie E, Zarin W, O'Brien KK, Colquhoun H, Levac D, et al. PRISMA Extension for Scoping Reviews (PRISMA-ScR): Checklist and Explanation. *Ann Intern Med.* 2018;169:467–473. doi: [10.7326/M18-0850](https://doi.org/10.7326/M18-0850).



# BMJ Open

## The Geriatric Emergency care Applied Research (GEAR) Network Approach: A Protocol To Advance Stakeholder Consensus and Research Priorities in Geriatrics and Dementia Care in the Emergency Department

|                                 |                                                                                                                                                                                                                                                                                                                                                                                                                                                                                                                                                                                                                                                                                                                                                                                                                                                                                                                                                                                                                                                                                                                                                                                |
|---------------------------------|--------------------------------------------------------------------------------------------------------------------------------------------------------------------------------------------------------------------------------------------------------------------------------------------------------------------------------------------------------------------------------------------------------------------------------------------------------------------------------------------------------------------------------------------------------------------------------------------------------------------------------------------------------------------------------------------------------------------------------------------------------------------------------------------------------------------------------------------------------------------------------------------------------------------------------------------------------------------------------------------------------------------------------------------------------------------------------------------------------------------------------------------------------------------------------|
| Journal:                        | <i>BMJ Open</i>                                                                                                                                                                                                                                                                                                                                                                                                                                                                                                                                                                                                                                                                                                                                                                                                                                                                                                                                                                                                                                                                                                                                                                |
| Manuscript ID                   | bmjopen-2022-060974.R1                                                                                                                                                                                                                                                                                                                                                                                                                                                                                                                                                                                                                                                                                                                                                                                                                                                                                                                                                                                                                                                                                                                                                         |
| Article Type:                   | Protocol                                                                                                                                                                                                                                                                                                                                                                                                                                                                                                                                                                                                                                                                                                                                                                                                                                                                                                                                                                                                                                                                                                                                                                       |
| Date Submitted by the Author:   | 22-Mar-2022                                                                                                                                                                                                                                                                                                                                                                                                                                                                                                                                                                                                                                                                                                                                                                                                                                                                                                                                                                                                                                                                                                                                                                    |
| Complete List of Authors:       | Hwang, Ula; Yale School of Medicine, Department of Emergency Medicine; James J Peters VA Medical Center, Geriatric Research, Education and Clinical Center<br>Carpenter, Chris; Washington University in St Louis School of Medicine, Washington University Division of Emergency Medicine<br>Dresden, Scott; Northwestern University Feinberg School of Medicine, Department of Emergency Medicine<br>Dussetschleger, Jeffrey; Yale School of Medicine, Department of Emergency Medicine<br>Gifford, Angela; University of Wisconsin-Madison, BerbeeWalsh Department of Emergency Medicine<br>Hoang, Ly; University of Wisconsin-Madison, BerbeeWalsh Department of Emergency Medicine<br>Leggett, Jesseca; Washington University in St Louis School of Medicine, Department of Emergency Medicine and Emergency Care Research Core<br>Nowroozpoor, Armin; Yale School of Medicine, Department of Emergency Medicine; Duke University School of Medicine<br>Taylor, Zachary; Northwestern University Feinberg School of Medicine, Department of Emergency Medicine<br>Shah, Manish; University of Wisconsin-Madison, Networks, The GEAR and GEAR 2.0; Yale School of Medicine |
| <b>Primary Subject Heading</b>: | Emergency medicine                                                                                                                                                                                                                                                                                                                                                                                                                                                                                                                                                                                                                                                                                                                                                                                                                                                                                                                                                                                                                                                                                                                                                             |
| Secondary Subject Heading:      | Geriatric medicine                                                                                                                                                                                                                                                                                                                                                                                                                                                                                                                                                                                                                                                                                                                                                                                                                                                                                                                                                                                                                                                                                                                                                             |
| Keywords:                       | Dementia < NEUROLOGY, ACCIDENT & EMERGENCY MEDICINE, GERIATRIC MEDICINE                                                                                                                                                                                                                                                                                                                                                                                                                                                                                                                                                                                                                                                                                                                                                                                                                                                                                                                                                                                                                                                                                                        |
|                                 |                                                                                                                                                                                                                                                                                                                                                                                                                                                                                                                                                                                                                                                                                                                                                                                                                                                                                                                                                                                                                                                                                                                                                                                |

SCHOLARONE™  
Manuscripts

1  
2  
3  
4  
5  
6  
7  
8  
9

## The Geriatric Emergency care Applied Research (GEAR) Network Approach: A Protocol to Advance Stakeholder Consensus and Research Priorities in Geriatrics and Dementia Care in the Emergency Department

10 Ula Hwang, MD, MPH ([ula.hwang@yale.edu](mailto:ula.hwang@yale.edu)), Department of Emergency Medicine, Yale School  
11 of Medicine, 464 Congress Ave, New Haven, CT 06519, USA (Corresponding author)  
12 Phone: (203) 785-4363, Fax: (203) 785-4580  
13  
14

15 Christopher R. Carpenter, MD, MSc ([carpenterc@wustl.edu](mailto:carpenterc@wustl.edu)), Washington University in St. Louis  
16 School of Medicine, Department of Emergency Medicine and Emergency Care Research Core,  
17 St. Louis, MO 63110, USA  
18  
19

20 Scott Dresden, MD, MS ([s-dresden@northwestern.edu](mailto:s-dresden@northwestern.edu)), Northwestern University Feinberg  
21 School of Medicine, Department of Emergency Medicine, Chicago, IL 60611, USA  
22  
23

24 Jeffrey Dussetschleger, DDS, MPH ([jeffrey.dussetschleger@yale.edu](mailto:jeffrey.dussetschleger@yale.edu)), Department of  
25 Emergency Medicine, Yale School of Medicine, 464 Congress Ave, New Haven, CT 06519, USA  
26  
27

28 Angela Gifford, MA ([agifford@medicine.wisc.edu](mailto:agifford@medicine.wisc.edu)), BerbeeWalsh Department of Emergency  
29 Medicine, University of Wisconsin-Madison, 800 University Bay Drive, Suite 310, Madison, WI  
30 53705, USA  
31  
32

33 Ly Hoang, BS ([lhoang@medicine.wisc.edu](mailto:lhoang@medicine.wisc.edu)), BerbeeWalsh Department of Emergency Medicine,  
34 University of Wisconsin-Madison, 800 University Bay Drive, Suite 310, Madison, WI 53705, USA  
35  
36

37 Jesseca Leggett, MBA candidate ([jleggett@wustl.edu](mailto:jleggett@wustl.edu)), Washington University in St. Louis School  
38 of Medicine, Department of Emergency Medicine and Emergency Care Research Core, St. Louis,  
39 MO 63110, USA  
40

41 Armin Nowroozpoor, MD ([armin.nowroozpoor@yale.edu](mailto:armin.nowroozpoor@yale.edu)), Department of Emergency  
42 Medicine, Duke University School of Medicine, Durham, North Carolina, 27710, USA  
43 Dr. Nowroozpoor was a Postdoctoral Associate in the Department of Emergency Medicine at  
44 Yale University School of Medicine at the time of this work.  
45  
46

47 Zachary Taylor, BS ([zachary.taylor@northwestern.edu](mailto:zachary.taylor@northwestern.edu)), Northwestern University Feinberg  
48 School of Medicine, Department of Emergency Medicine, Chicago, IL 60611, USA  
49  
50

51 Manish N. Shah, MD, MPH ([mnshah@medicine.wisc.edu](mailto:mnshah@medicine.wisc.edu)), BerbeeWalsh Department of  
52 Emergency Medicine, University of Wisconsin-Madison, 800 University Bay Drive, Suite 310,  
53 Madison, WI 53705, USA  
54  
55

56 On behalf of The GEAR\* and GEAR 2.0\*\* Networks  
57  
58  
59  
60

1  
2  
3  
4  
5  
6  
7  
8  
9  
10  
11  
12  
13  
14  
15  
16  
17  
18  
19  
20  
21  
22  
23  
24  
25  
26  
27  
28  
29  
30  
31  
32  
33  
34  
35  
36  
37  
38  
39  
40  
41  
42  
43  
44  
45  
46  
47  
48  
49  
50  
51  
52  
53  
54  
55  
56  
57  
58  
59  
60

For peer review only



1  
2  
3 *Acknowledgements:*  
4  
5

6 GEAR Network consists of:

7 M. Fernando Bellolio, Kevin Biese, Christine Binkley, Nicolas Bott, Abraham Brody, Christopher  
8 Carpenter, Sunday Clark, Scott Dresden, Savannah Forester, Cameron Gettel, Elizabeth Goldberg, Allyson  
9 Greenberg, Nada Hammouda, Jin Han, Nicole S. Hastings, Teresita Hogan, William Hung, Ula Hwang, Jay  
10 Kayser, Maura Kennedy, Kelly Ko, Adriane Lesser, Elizabeth Linton, Shan Liu, Aaron Malsch, Don Melady,  
11 Carmen Morano, Nancy Morrow-Howell, Denise Nassisi, Lori Nerbonne, Sylvie Nyamu, Ugochi  
12 Ohuabunwa, Timothy Platts-Mills, Luna Ragsdale, Lynne Richardson, Thom Ringer, Anthony Rosen, Mark  
13 Rosenberg, Manish Shah, Rachel Skains, Stephanie Skees, Kimberly Souffront, Laura Stabler, Connor  
14 Sullivan, Joseph Suyama, Samuel Vargas, E. Camille Vaughan, Corrine Voils, Daniel Wei.  
15

16  
17 GEAR 2.0 Network consists of:

18 Heather Allore, Amy Aloysi, Michael Belleville, M. Fernanda Bellolio, Marian Betz, Kevin Biese, Cynthia  
19 Brandt, Ryan Carnahan, David Carr, Jennie Chin-Hansen, Morgan Daven, Nida Degesys, Michael  
20 Ellenbogen, Marcus Escobedo, Jason Falvey, Thomas Gill, Andrea Gilmore-Bykovskiy, Elizabeth Goldberg,  
21 Jin Han, James Hardy, Susan (Nicki) Hastings, Jon Mark Hirshon, Teresita Hogan, William Hung, Eric  
22 Isaacs, Kathleen Kelly, Maura Kennedy, Amy JH Kind, Caitlin Malicki, Michael Malone, Richard Marottoli,  
23 Michelle Moccia, Vincent Mor, John Morris, Nancy Morrow Howell, Armin Nowroozpoor, Ugochi  
24 Ohuabunwa, Brenda Oiyemhonlan, William Perry, Maria Raven, Kristin Rising, Mary Sano, Laura Stabler,  
25 Conor Sullivan, Joe Suyama, Jeremy Swartzberg, Vaishal Tolia, Allan Vann, Sandra Weintraub, and Susan  
26 Zieman.  
27  
28  
29  
30  
31  
32  
33

34 **Keywords:** Emergency Medicine, geriatrics, dementia, research priorities, stakeholder,  
35 consensus  
36  
37

38 **Word Count:** 3978  
39  
40  
41  
42  
43  
44  
45  
46  
47  
48  
49  
50  
51  
52  
53  
54  
55  
56  
57  
58  
59  
60

## ABSTRACT

### Introduction

Increasingly, older adults are turning to emergency departments (EDs) to address health care needs. To achieve these research demands, infrastructure is needed to both generate evidence of intervention impact and advance development of implementation science, pragmatic trials evaluation, and dissemination of findings from studies addressing the emergency care needs of older adults. The Geriatric Emergency Care Applied Research Network (<https://gearnetwork.org>) has been created in response to these scientific needs – to build a transdisciplinary infrastructure to support the research that will optimize emergency care for older adults and persons living with dementia (PLWD).

### Methods and Analysis

In this paper we describe our approach to developing the GEAR Network infrastructure, the scoping reviews to identify research and clinical gaps, and its use of consensus-driven research priorities with a transdisciplinary taskforce of stakeholders that includes patients and care partners. We describe how priority topic areas are ascertained, the process of conducting scoping reviews with integrated academic librarians performing standardized searches and providing quality control on reviews, input and support from the taskforce, and conducting a large-scale consensus workshop to prioritize future research topics. The GEAR Network approach provides a framework and systematic approach to develop a research agenda and support research in geriatric emergency care.

## Ethics and dissemination

This is a systematic review of previously conducted research; accordingly, it does not constitute human subjects research needing ethics review. This review will be prepared as a manuscript and submitted for publication to a peer-reviewed journal, and the results will be presented at conferences.

Open Science Framework registered DOI: [10.17605/OSF.IO/6QRYX](https://doi.org/10.17605/OSF.IO/6QRYX), [10.17605/OSF.IO/AKVZ8](https://doi.org/10.17605/OSF.IO/AKVZ8),  
[10.17605/OSF.IO/EPVR5](https://doi.org/10.17605/OSF.IO/EPVR5), [10.17605/OSF.IO/VXPRS](https://doi.org/10.17605/OSF.IO/VXPRS)

## Strengths and limitations of the study:

- The inclusion of transdisciplinary stakeholder participants as part of the scoping review and consensus process to identify research gaps and priorities.
- Cross coordination with medical librarians of scoping review searches.
- Creation of a Health Equity Advisory Board to ensure meaningful inclusion of diverse populations in studies focused on the emergency care of people living with dementia.
- A well-defined search strategy created by a team of academic research librarians to search a broad group of databases.
- Small body of published literature in topic areas.

## INTRODUCTION

Increasingly, older adults are turning to emergency departments (EDs) to address health care needs.<sup>1,2</sup> Older adults (aged 65 and older) in the United States visit the ED at a rate of 51.1 per 100 persons per year.<sup>3</sup> Recommendations to transform EDs to better care for older adults have included redesigning services and processes.<sup>4-6</sup> Geriatric emergency care and Geriatric EDs (GEDs) have emerged over the past decade as innovative solutions to better provide emergency care for older adults.<sup>4,6-8</sup> However, many of the processes, protocols, and care models targeting older patients with emergency care remain untested in the unique ED setting. Consequently, *the impact of geriatric emergency care for older adults is unknown.*<sup>9,10</sup> Further, novel interventions and best practices tailored to the ED setting need to be developed for both older adults and persons living with dementia (PLWD). To achieve these research demands, infrastructure is needed for GEDs to both generate evidence of intervention impact and advance development of implementation science, pragmatic trials evaluation, and dissemination of findings from these studies.<sup>11</sup>

The Geriatric Emergency Care Applied Research (GEAR) Network was created in response to these scientific needs – to build a transdisciplinary infrastructure to support the research that will optimize emergency care for older adults and PLWD.<sup>12</sup> The GEAR Network (<https://gearnetwork.org>) is supported by the National Institute on Aging (NIA) and partner organizations, The Gary and Mary West Health Institute and The John A. Hartford Foundation (jointly on The Geriatric Emergency Department Collaborative grant (Award number N/A) with two phased awards: GEAR (R33 AG058926 add dates) and GEAR 2.0 - Advancing Dementia Care (GEAR 2.0 ADC) (R61 AG069822 September 2020 – June 2022). In the first phase of both

1  
2  
3 awards, key stakeholders from emergency medicine, geriatrics, nursing, psychiatry, pharmacy,  
4  
5 social work, individuals representing health care systems, clinicians, researchers, medical  
6  
7 specialty organizations, advocacy organizations, caregivers, older adults, and people living with  
8  
9 dementia to identify consensus-driven research priorities that will improve the care of older  
10  
11 adults (GEAR). GEAR 2.0 ADC added PLWD and care partners to the team. The second phase  
12  
13 consists of pilot grant funding to support investigators that advance research priorities  
14  
15 identified by stakeholder consensus.  
16  
17  
18

19  
20 The original GEAR project (hereafter referred to simply as GEAR) is dedicated to  
21  
22 improving ED care of the older adult and focused on the priority topics of: care transitions,  
23  
24 cognitive impairment – delirium, medication safety, elder abuse, and falls. Four of the five GEAR  
25  
26 research priorities have already been published using this approach.<sup>13-16</sup> GEAR 2.0 ADC is  
27  
28 focused on optimizing emergency care for persons living with dementia and their care partners  
29  
30 in the priority areas of: ED practices, ED care transitions, detection, and communication and  
31  
32 shared decision making.  
33  
34  
35

36  
37 In this paper we describe the Phase 1 methods used by GEAR 2.0 ADC to identify  
38  
39 consensus-driven research priorities, which were based on methods used for GEAR. We  
40  
41 describe how we identified the priority topic areas, conducted scoping reviews in each topic  
42  
43 area while integrating input from a transdisciplinary stakeholder taskforce, integrated academic  
44  
45 librarians in the review process to perform standardized searches and provide quality control,  
46  
47 and conducted a large-scale consensus conference to prioritize future research. The GEAR  
48  
49  
50  
51  
52 Network approach may be valuable for other specialties, disciplines, and organizations  
53  
54  
55  
56  
57  
58  
59  
60

1  
2  
3 attempting to identify research and practice gaps, generate evidence, build collaborations, and  
4  
5 target high-yield research questions to optimize the care of older adults.  
6  
7  
8  
9

## 10 **METHODS / DESIGN**

### 11 **GEAR 2.0 ADC Design and Structure**

12  
13  
14  
15  
16  
17  
18 Like GEAR, GEAR 2.0 ADC is a phased program that provides infrastructure to the  
19  
20 support mission of increasing transdisciplinary research to improve emergency care for persons  
21  
22 living with dementia and their care partners. The organizational structure of GEAR 2.0 ADC  
23  
24 (Figure 1) consists of committees that guide operations, a taskforce of stakeholder members  
25  
26 that join workgroups and participate in the consensus conference during the first phase (2  
27  
28 years), and Cores that support training and expert consultation for pilot studies that will be  
29  
30 conducted during the second phase (3 years). GEAR 2.0 ADC is from June 1, 2020 to May 31,  
31  
32 2025.  
33  
34  
35  
36  
37  
38  
39

#### 40 **The Executive Committee**

41  
42 GEAR 2.0 ADC is operationally coordinated by the Executive Committee that oversees  
43  
44 and guides the program and activities in both phases. The Executive Committee is led by  
45  
46 geriatric emergency medicine investigators who also lead one of the 4 priority topic  
47  
48 workgroups. Each of these leads were selected based on geriatric emergency medicine  
49  
50 expertise and the concurrent engagement of local Alzheimer's disease Research Center faculty  
51  
52  
53  
54  
55  
56  
57  
58  
59  
60

1  
2  
3 at their sites. These investigators supervise the GEAR 2.0 ADC efforts and meet virtually on a  
4  
5 biweekly basis.  
6  
7  
8  
9

## 10 The Oversight Committee

11  
12 The Oversight Committee consists of content experts in geriatrics, emergency medicine,  
13 and Alzheimer's disease and Related Disorders (ADRD) that provides high-level guidance to the  
14 Executive Committee during quarterly meetings. Representatives from the NIA also participate  
15 in these meetings to hear updates and progress of GEAR 2.0 ADC activities. The Oversight  
16 Committee provides interdisciplinary guidance on the project direction, content and research  
17 approaches, and future directions to address cross-disciplinary gaps highlighted by the  
18 American Geriatrics Society conference series.<sup>17</sup>  
19  
20  
21  
22  
23  
24  
25  
26  
27  
28  
29  
30  
31

## 32 Health Equity Advisory Board

33  
34 To address the need for greater equity in emergency care research in geriatrics and  
35 dementia care both with regards to PLWD, care partners, and researchers, a Health Equity  
36 Advisory Board (HEAB) was created. The HEAB provides guidance and feedback on GEAR 2.0  
37 ADC activities, to ensure meaningful inclusion of diverse populations based on race, gender,  
38 ethnic/religious affiliation, sex identification, along with the impact of social determinants of  
39 health in studies focused on the emergency care of people living with dementia. HEAB  
40 members include PLWD, their caregiver and care partners, advocates, and stakeholders all from  
41 underrepresented populations or groups. Current board members include individuals that are  
42 African American, Hispanic, Asian, and lesbian. The HEAB will follow the NIA Health Disparities  
43  
44  
45  
46  
47  
48  
49  
50  
51  
52  
53  
54  
55  
56  
57  
58  
59  
60

1  
2  
3 Research Framework<sup>18</sup> approach and will work with partner organizations like the IMPACT

4  
5 (Imbedded Pragmatic Alzheimer's disease and AD-Related Dementias Clinical Trials)

6  
7 Collaboratory, an organization that is developing strategies to address diversity and inclusion in

8  
9 studies focused on PLWD.<sup>19</sup> This includes addressing the four key levels of analyses related to

10  
11 the NIA health disparities priorities of environmental, sociocultural, behavioral, and biological

12  
13 disparities in health for older minority populations. We will incorporate the lifecourse

14  
15 perspective, which is a "multidisciplinary approach to understanding the mental, physical, and

16  
17 social health of individuals, which incorporates both life span and life stage concepts that

18  
19 determine health trajectory and influence population-level health disparities."<sup>18</sup>

## 20 21 22 23 24 25 26 27 Project Team Staff

28  
29 GEAR 2.0 ADC activities are supported by smaller project teams where each of the  
30  
31 Executive Committee leads are located. Local project team members include a research  
32  
33 coordinator and academic medical school librarian to facilitate GEAR 2.0 ADC activities, the bulk  
34  
35 of which includes including conducting the scoping reviews. Additional activities of the  
36  
37 research coordinators include coordinating communication with all members, and organizing  
38  
39 meetings (including presentations, recordings, minute preparation).  
40  
41  
42  
43  
44  
45  
46

## 47 48 *Patient and Public Involvement Statements:*

49  
50 Throughout the Methods, the involvement, inclusion, and representation of patients,  
51  
52 and public partners are described. The GEAR 2.0 ADC Taskforce and Workgroups are  
53  
54 transdisciplinary groups of stakeholders committed to improve the emergency care of PLWD.  
55  
56  
57  
58  
59  
60



1  
2  
3 Members were identified to participate based on content expertise, their positions in partner  
4 organizations, and referrals from other invited members. The Executive Committee invited  
5 participants to ensure diversity of background and expertise while ensuring a manageable  
6 group size. They include emergency physicians, geriatricians, neurologists, psychiatrists,  
7 neuropsychologists, nurses, social workers, pharmacists, physical therapists, patient advocates,  
8 and most importantly PLWD and their care partners.  
9  
10  
11  
12  
13  
14  
15  
16  
17  
18  
19

## 20 GEAR 2.0 ADC Taskforce and Workgroups

21  
22 The GEAR 2.0 ADC Taskforce is a transdisciplinary group of stakeholders committed to  
23 improve the emergency care of PLWD. Members were identified to participate based on  
24 content expertise, their positions in partner organizations, and referrals from other invited  
25 members. The Executive Committee invited participants to ensure diversity of background and  
26 expertise while ensuring a manageable group size. They include 47 individuals who identified  
27 themselves as emergency physicians, geriatricians, neurologists, psychiatrists,  
28 neuropsychologists, nurses, social workers, pharmacists, physical therapists, patient advocates,  
29 and most importantly PLWD and their care partners. (Figure 2 GEAR Taskforce Composition)  
30  
31  
32  
33  
34  
35  
36  
37  
38  
39  
40  
41

42 Taskforce members participate on one or more workgroups that represented research  
43 and clinical practice priorities in four topics (see below for how these topics were chosen):  
44  
45  
46

- 47 1. Optimal ED care practices for PLWD and their caregivers (ED Practices)
  - 48 2. Optimal ED care transitions for PLWD and their caregivers (ED Care Transitions)
  - 49 3. Approaches to identify ED PLWD (diagnosed and undiagnosed ADRD) (Detection)
- 50  
51  
52  
53  
54  
55  
56  
57  
58  
59  
60

- 1  
2  
3 4. Approaches to communication and shared decision making in ED treatment and  
4  
5 disposition for PLWD and their caregivers (Communication and decision making).  
6  
7  
8  
9  
10  
11  
12

### 13 **Approach**

#### 14 15 16 17 18 GEAR 2.0 ADC operational overview

19  
20 During the first phase, GEAR 2.0 ADC identified and prioritized research by completing  
21  
22 scoping reviews in each of the priority topics and then held a two-day consensus conference of  
23  
24 key stakeholders who discussed and voted on research priorities to optimize emergency care  
25  
26 for PLWD. The GEAR Network Consensus Conference approach is modeled after the Cornell  
27  
28 Institute for Translational Research on Aging (CITRA) process for developing stakeholder-based  
29  
30 translational research agendas in aging.<sup>20</sup> Unlike CITRA, the GEAR Network approach has more  
31  
32 extensive preparatory work prior to the consensus conference that includes completion of  
33  
34 scoping reviews in pre-selected priority areas prior to the Consensus Conference. Completion  
35  
36 of the scoping review required: 1. Proposing initial research priorities in each of the domains. 2.  
37  
38 Using a Population, Intervention, Comparison, Outcome (PICO) framework for the research  
39  
40 questions to conduct structured literature searches with academic librarians to identify  
41  
42 publications related to the domains (Round 1 priority research questions), 3. Summarizing the  
43  
44 most recent scientific reviews of ED-based trials, observational, and/or retrospective studies (if  
45  
46 any) that address the priority area, 4. Extracting major conclusions from relevant literature  
47  
48 identified or other systematic reviews related to the PICO question. The results of the scoping  
49  
50  
51  
52  
53  
54  
55  
56  
57  
58  
59  
60

1  
2  
3 reviews were then used as the basis for discussion and considerations of research priorities at  
4  
5 the consensus conference.  
6

7  
8 During the second phase, GEAR 2.0 ADC will fund pilot studies that encourage  
9  
10 transdisciplinary collaboration to address the research priorities ranked by the stakeholders  
11  
12 from the first phase.  
13

#### 14 15 16 17 18 Priority Domain Determination

19  
20 GEAR 2.0 ADC Taskforce members ranked priority topics in December 2019 during the  
21  
22 grant proposal preparation process. The Executive Committee proposed the multiple priority  
23  
24 topics which the Taskforce ranked. These were then emailed as a survey to Taskforce members  
25  
26 to rank the importance of each topic and the top ones were selected to be the focus of GEAR  
27  
28 2.0 ADC activities. Based on past experience in GEAR, the decision was made to limit efforts to  
29  
30 four workgroups based on capacity and workload.  
31  
32  
33  
34  
35  
36  
37

#### 38 Workgroup Pre-Conference Activities

39  
40 Each workgroup was led by an Executive Committee member lead and supported by the  
41  
42 Project Team Staff. At the study kickoff meeting, Taskforce members were invited to participate  
43  
44 in any of the four workgroups representing research and practice priority domains. Taskforce  
45  
46 members joined workgroups based on their interests and expertise, noting their preferences  
47  
48 through an online survey. Though most requests were honored, some respondents were  
49  
50 assigned to non-primary choices to ensure diversity of background and maintain workable  
51  
52  
53  
54  
55  
56  
57  
58  
59  
60

1  
2  
3 group sizes of 12-14 participants. While participants were encouraged to only engage with one  
4  
5  
6 group, a number engaged in multiple groups.  
7

8 Each workgroup's leader developed a charter document that consisted of a description  
9  
10 of the workgroup's topic, goals, meeting dates, membership list, as well as expectations of both  
11  
12 group leadership and participants. All workgroups met monthly for one hour, while work  
13  
14 continued asynchronously through emails moderated by the group leadership. Files are  
15  
16 accessible through cloud-based file sharing tools and servers to provide a single source of  
17  
18 information for all members. These workgroup meetings served to review the progress of the  
19  
20 project, to discuss and reflect on project findings, and to frame project directions. Workgroups  
21  
22 particularly had extensive discussions to develop key questions and identify research gaps using  
23  
24 the PICO approach.<sup>21</sup>  
25  
26  
27  
28  
29  
30  
31

### 32 Phase 1: Scoping Review Process 33

34  
35 In preparation for the GEAR 2.0 ADC Consensus Conference, scoping reviews were  
36  
37 conducted in the four domains. We followed the PRISMA ScR – Scoping review checklist process  
38  
39 to explore both the breadth of literature in this area and identify the knowledge and practice  
40  
41 gaps.<sup>22</sup> Scoping reviews are preferred for this type of work as they incorporate a wider range of  
42  
43 literature than systematic reviews and can provide more synthesized ideas for future  
44  
45 systematic reviews.<sup>22, 23</sup>  
46  
47  
48  
49  
50  
51

### 52 *Development of PICO Research Questions* 53

54 Each workgroup brainstormed potential PICO questions within their domains. The  
55  
56  
57  
58  
59  
60

workgroups iteratively refined and reviewed the questions and then submitted them to the Executive Committee for review. Each workgroup had approximately 20 questions. The Executive Committee, through joint discussion among the workgroup leads, ensured that questions were distinct. The full Taskforce ranked questions for each workgroup via an online survey (Qualtrics). A respondent weighting system was used to identify the top research questions with workgroup members' ranking weighted double that of other taskforce members. The top two questions were then formatted using the PICO approach.<sup>21</sup> (Tables 1-4)

Table 1. Communication and Decision-Making PICO Research Questions

| Preliminary PICO Questions                                                                                                                                                                                                                                                                                                                                                                                                                                                                                                                                                                                                                                                                                                                                                                                                                                                                                                                                                                                                                                                                                                                                                                                                                                                                                                                                                                                                                                                                                                                                                                                                                                                                                                                                                                                                                                                                                                                                                                                                                                  | Final Two PICO Questions                                                                                                                                                                                                                                                                                                                     |
|-------------------------------------------------------------------------------------------------------------------------------------------------------------------------------------------------------------------------------------------------------------------------------------------------------------------------------------------------------------------------------------------------------------------------------------------------------------------------------------------------------------------------------------------------------------------------------------------------------------------------------------------------------------------------------------------------------------------------------------------------------------------------------------------------------------------------------------------------------------------------------------------------------------------------------------------------------------------------------------------------------------------------------------------------------------------------------------------------------------------------------------------------------------------------------------------------------------------------------------------------------------------------------------------------------------------------------------------------------------------------------------------------------------------------------------------------------------------------------------------------------------------------------------------------------------------------------------------------------------------------------------------------------------------------------------------------------------------------------------------------------------------------------------------------------------------------------------------------------------------------------------------------------------------------------------------------------------------------------------------------------------------------------------------------------------|----------------------------------------------------------------------------------------------------------------------------------------------------------------------------------------------------------------------------------------------------------------------------------------------------------------------------------------------|
| <ol style="list-style-type: none"> <li>1. As a decision-making strategy, does accelerated triage for patients with severe dementia improve the process or outcomes of ED care?</li> <li>2. How does "communication and decision-making" differ for persons with dementia compared to persons without dementia (examples: obtaining information, ascertaining pain severity)?</li> <li>3. How should presenting complaint, dementia severity, underlying frailty/vulnerability or other patient-level factors influence the ED communication strategy?</li> <li>4. Are there specific medical communication strategies (such as "Teach Back" or next day telephone follow-up) that improve the process or outcomes of ED care in persons with dementia?</li> <li>5. Is safe, effective, and efficient Shared Decision Making possible in persons with dementia or other cognitive impairment?</li> <li>6. How frequently (and to what extent) do overlying sensory deficits (hearing impairment, vision problems) confound patient-physician communication during episodes of emergency care in persons with dementia?</li> <li>7. Are members of the healthcare team (nurse, social worker, physician extenders, pharmacist, and/or physicians) who receive specific training in how to communicate with and treat dementia patients able to communicate more effectively with dementia patients and their caregivers?</li> <li>8. Do patients and care partners who are unaware of or seemingly in denial of a dementia diagnosis benefit from rapid referral for a 2nd opinion to a dementia clinic (MDC or GAC)?</li> <li>9. What approaches are effective and accessible (considering health literacy needs, etc.) for providing education to patients and caregivers in the ED about the diagnosis of dementia and accessible local resources in the community?</li> <li>10. How can emergency medicine providers ascertain when the caregiver does or does not understand the patient's baseline condition or vulnerability to stresses of</li> </ol> | <p>Question 1: How does communication and decision-making differ for persons with dementia compared to persons without dementia?</p> <p>Question 2: Are there specific medical communication strategies (such as "teach-back" or next day telephone follow-up) that improve the process or outcomes of ED care in persons with dementia?</p> |

1  
2  
3  
4 illness or injury (or pharmacological interventions)?

5 11. When (and how) do emergency medicine providers seek additional details from  
6 caregiver?

7 12. What cognitive impairment diagnosis or findings should be communicated by  
8 emergency department providers to inpatient providers and primary care physicians  
9 regarding concerns about dementia?

10 13. What specific resources (home safety assessment, fall prevention, geropsych  
11 follow up, social work abuse assessment, Alzheimer's Association, etc.) should be  
12 communicated (and how) to the patient and caregiver to improve quality of care and  
13 prevent future ED visits/hospitalizations?

14 14. What is the potential role(s) of Observation units (short stay visits) in assisting  
15 communication and medical decision making in dementia care? Could they reduce  
16 the number of ED visits and/or the time patients stay in the ED?

17 15. How can lack of cultural understanding by ED healthcare providers limit alignment  
18 of communication of options and ascertaining comprehension of options?

19 16. How do patients' cultural differences influence how dementia resources may be  
20 accepted, available and/or followed and how should communication strategies differ  
21 among various populations that come to the ED to acknowledge these differences?

22 17. How does the presence of dementia interact with inequities in emergency  
23 medicine healthcare delivery?  
24  
25  
26  
27  
28  
29  
30  
31  
32  
33  
34  
35  
36  
37  
38  
39  
40  
41  
42  
43  
44  
45  
46  
47  
48  
49  
50  
51  
52  
53  
54  
55  
56  
57  
58  
59  
60

Table 2. Detection/ Identification of Dementia/Cognitive Impairment PICO Research Questions

| Preliminary PICO Questions                                                                                                                                                                                                                                                                                                                                                                                                                                                                                                                                                                                                                                                                                                                                                                                                                                                                                                                                                                                                                                                                                                                                                                                                                                                                                                                                                                                                                                                                                                                                                                                                                                                                                                                                                                                                                                                                                                                                                                                                                                                                                                                                                                                                                                                                                                                                                                                                                                                                                                                                                                                                                                                                          | Final Two PICO Questions                                                                                                                                                                                                                                                                                                                                                                                                            |
|-----------------------------------------------------------------------------------------------------------------------------------------------------------------------------------------------------------------------------------------------------------------------------------------------------------------------------------------------------------------------------------------------------------------------------------------------------------------------------------------------------------------------------------------------------------------------------------------------------------------------------------------------------------------------------------------------------------------------------------------------------------------------------------------------------------------------------------------------------------------------------------------------------------------------------------------------------------------------------------------------------------------------------------------------------------------------------------------------------------------------------------------------------------------------------------------------------------------------------------------------------------------------------------------------------------------------------------------------------------------------------------------------------------------------------------------------------------------------------------------------------------------------------------------------------------------------------------------------------------------------------------------------------------------------------------------------------------------------------------------------------------------------------------------------------------------------------------------------------------------------------------------------------------------------------------------------------------------------------------------------------------------------------------------------------------------------------------------------------------------------------------------------------------------------------------------------------------------------------------------------------------------------------------------------------------------------------------------------------------------------------------------------------------------------------------------------------------------------------------------------------------------------------------------------------------------------------------------------------------------------------------------------------------------------------------------------------|-------------------------------------------------------------------------------------------------------------------------------------------------------------------------------------------------------------------------------------------------------------------------------------------------------------------------------------------------------------------------------------------------------------------------------------|
| <ol style="list-style-type: none"> <li>1. Which ED patients (diagnosed vs. undiagnosed, by age group) should be screened for cognitive impairment? (mild cognitive impairment (MCI), dementia)? Are there differences by race and ethnicity?</li> <li>2. How can the ED best identify cognitive impairment? (Best in terms of sensitivity, reliability, practicality, ease and speed of completion, etc.) Are there differences by race or ethnicity?</li> <li>3. Are there pragmatic cognitive impairment screening tools that can identify patients at risk of dementia? (Pragmatic in terms of ease of use, training, quickness to complete, etc.)</li> <li>4. Can educational programs improve detection of dementia in ED patients?</li> <li>5. Who in the ED should complete cognitive impairment screenings or assessments? (ED clinicians (physicians, nurses, etc.), non-clinicians (technicians, research assistants, etc.), patients completing self-assessments on interactive tables, etc.)</li> <li>6. Is there an objective bedside diagnostic test in the ED (i.e., plasma test, bedside EEG, etc.) to improve dementia screening accuracy? (e.g., plasma test)</li> <li>7. When in the ED care continuum should cognitive screening be done? (before, during, after the ED visit)</li> <li>8. Can the ED screen for undiagnosed dementia and refer patients for further assessment? Are there differences by race and ethnicity?</li> <li>9. How to account for language and cultural differences with diverse ED population in existing screening tools for cognitive impairment?</li> <li>10. Is the electronic health record optimized to alert healthcare providers of patients already diagnosed with dementia?</li> <li>11. Does identification of patients with dementia change ED outcomes for these patients?</li> <li>12. What outcomes are associated with undiagnosed dementia in the ED?</li> <li>13. What outcomes are associated with undetected dementia in the ED?</li> <li>14. What is the impact (positive / negative) of ED dementia screening?</li> <li>15. In cases of known dementia, does detection include assessment for patient and caregiver support?</li> <li>16. What are the ethical responsibilities of the ED clinicians to convey information about screening results versus diagnoses?</li> <li>17. What are the repercussions about reporting dementia detected in the ED and their impact on subsequent care, patient stigma or anxiety?</li> <li>18. How do symptoms of cognitive impairment without a diagnosis affect persons with dementia, particularly since diagnostic uncertainty frequently occurs in emergency medicine?</li> </ol> | <p>Question 1: How can the ED best identify cognitive impairment? (Best in terms of sensitivity, specificity, reliability, practicality, easy and speed of completion, etc.) Are there differences by race or ethnicity?</p> <p>Question 2: Are there pragmatic cognitive impairment screening tools that can identify patients at risk of dementia? (Pragmatic in terms of ease of use, training, quickness to complete, etc.)</p> |

Table 3. Care Transitions PICO Research Questions

| Preliminary PICO Questions                                                                                                                                                                                                                                                                                                                                                                                                                                                                                                                                                                                                                                                                                                                                                                                                                                                                                                                                                                                                                                                                                                                                                                                                                                                                                                                                                                                                                                                                                                                                                                                                                                                                                                                                                                                                                                                                                                                                                                                                                                                                                                                                                                                                                                                                                                                                                                                                                                                                                                 | Final Two PICO Questions                                                                                                                                                                                                                                                                                              |
|----------------------------------------------------------------------------------------------------------------------------------------------------------------------------------------------------------------------------------------------------------------------------------------------------------------------------------------------------------------------------------------------------------------------------------------------------------------------------------------------------------------------------------------------------------------------------------------------------------------------------------------------------------------------------------------------------------------------------------------------------------------------------------------------------------------------------------------------------------------------------------------------------------------------------------------------------------------------------------------------------------------------------------------------------------------------------------------------------------------------------------------------------------------------------------------------------------------------------------------------------------------------------------------------------------------------------------------------------------------------------------------------------------------------------------------------------------------------------------------------------------------------------------------------------------------------------------------------------------------------------------------------------------------------------------------------------------------------------------------------------------------------------------------------------------------------------------------------------------------------------------------------------------------------------------------------------------------------------------------------------------------------------------------------------------------------------------------------------------------------------------------------------------------------------------------------------------------------------------------------------------------------------------------------------------------------------------------------------------------------------------------------------------------------------------------------------------------------------------------------------------------------------|-----------------------------------------------------------------------------------------------------------------------------------------------------------------------------------------------------------------------------------------------------------------------------------------------------------------------|
| <ol style="list-style-type: none"> <li>1. What interventions (e.g., Electronic Medical Record, coaching, follow up; to be defined in the PICO) delivered to ED patients with impaired cognition improve ED to home transitions? (or to other settings like Skilled Nursing Facility/Nursing Home/hospice)</li> <li>2. What components of interventions delivered to ED patients with impaired cognition improve ED to home transitions?</li> <li>3. What interventions delivered to caregivers of ED patients with impaired cognition improve ED to home transitions? (or to other settings like Skilled Nursing Facility/Nursing Home/hospice)</li> <li>4. What components of interventions delivered to caregivers of ED patients with impaired cognition improve ED to home transitions.</li> <li>5. What elements of care transitions have the greatest negative impact when it comes to the care of PLWD transitioning from ED to a new place (home, facility, unit)</li> <li>6. What are patient-centered metrics of quality transitions for ED patients with impaired cognition?</li> <li>7. What predicts an ED patient with impaired cognition for needing support with care transitions / having poor outcomes from care transitions?</li> <li>8. Would prioritizing ED care for patients with impaired cognition (similar to trauma/stroke) lead to a more positive transition to home (or to other settings)?</li> <li>9. What are characteristics of the care partner that enable or impede effective care transitions?</li> <li>10. What are interventions that can be applied across multiple transitions longitudinally that improve the care of PLWD?</li> <li>11. How do PLWD, care partners, and other stakeholders define care needs and goals specific to ED transitions?</li> <li>12. Who are the essential personnel required to optimize ED care transitions for PLWD (social work, nursing, ED physician, primary care/inpatient team, care partner, others)?</li> <li>13. What decisions around care transitions should cognitively impaired patients make?</li> <li>14. How can ED providers determine if the patient has a safe living environment and, if needed, improve the living situation?</li> <li>15. What is the most effective form of follow-up for persons with dementia and at what time interval?</li> <li>16. What interventions optimize ED physician communication to inpatient and primary care providers regarding concerns related to cognition of ED patients?</li> </ol> | <p>Question 1: What interventions delivered to ED patients with impaired cognition and their care partners improve ED discharge transitions?</p> <p>Question 2: What measures of quality ED discharge transitions are important to varying groups of ED patients with impaired cognition and their care partners?</p> |



Table 4. Optimal ED Practices PICO Research Questions

| Preliminary PICO Questions                                                                                                                                                                                                                                                                                                                                                                                                                                                                                                                                                                                                                                                                                                                                                                                                                                                                                                                                                                                                                                                                                                                                                                                                                                                                                                                                                                                                                                                                                                                                                                                                                                                                                                                                                                                                                                                                                                                                                                                                                                                                                                                                                                                                                                                                                                                                                                                                                                                                                                                                                                                                                                                                                                                                                                                                                                                                                                                                                                                                                                                                                                                                                                                                                                                                    | Final Two PICO Questions                                                                                                                                                                                                                                                                  |
|-----------------------------------------------------------------------------------------------------------------------------------------------------------------------------------------------------------------------------------------------------------------------------------------------------------------------------------------------------------------------------------------------------------------------------------------------------------------------------------------------------------------------------------------------------------------------------------------------------------------------------------------------------------------------------------------------------------------------------------------------------------------------------------------------------------------------------------------------------------------------------------------------------------------------------------------------------------------------------------------------------------------------------------------------------------------------------------------------------------------------------------------------------------------------------------------------------------------------------------------------------------------------------------------------------------------------------------------------------------------------------------------------------------------------------------------------------------------------------------------------------------------------------------------------------------------------------------------------------------------------------------------------------------------------------------------------------------------------------------------------------------------------------------------------------------------------------------------------------------------------------------------------------------------------------------------------------------------------------------------------------------------------------------------------------------------------------------------------------------------------------------------------------------------------------------------------------------------------------------------------------------------------------------------------------------------------------------------------------------------------------------------------------------------------------------------------------------------------------------------------------------------------------------------------------------------------------------------------------------------------------------------------------------------------------------------------------------------------------------------------------------------------------------------------------------------------------------------------------------------------------------------------------------------------------------------------------------------------------------------------------------------------------------------------------------------------------------------------------------------------------------------------------------------------------------------------------------------------------------------------------------------------------------------------|-------------------------------------------------------------------------------------------------------------------------------------------------------------------------------------------------------------------------------------------------------------------------------------------|
| <ol style="list-style-type: none"> <li>1. How do emergency care needs differ for PLWD differ from other patients in the ED?</li> <li>2. What components of ED care improve patient-centered outcomes for PLWD?</li> <li>3. Possible components may include: ED environment, patient length of stay in the ED, evaluation and identification of delirium, assessment and treatment of pain, management of agitation, scheduling outpatient follow-up, etc.</li> <li>4. What patient-centered metrics best measure the impact of ED interventions for persons with dementia?</li> <li>5. Does optimal ED care prevent incident delirium for PLWD in the ED?</li> <li>6. How does severity of dementia and presence of other health issues impact the optimal delivery of ED care for PLWD?</li> <li>7. How do social determinants of health such as race, ethnicity, wealth, and access to medical care impact delivery of optimal ED care for PLWD?</li> <li>8. How frequently are PLWD evaluated for delirium in the ED?</li> <li>9. How accurately do ED clinicians identify delirium in PLWD in usual practice?</li> <li>10. What is the accuracy of delirium identification tools for PLWD in the ED?</li> <li>11. How can rapidly progressive dementia be identified in the ED? Should patients with rapidly progressive dementia be admitted for expedited workup?</li> <li>12. What are the best pharmacological and non-pharmacological strategies to manage agitation and other behavioral concerns for PLWD in the ED?</li> <li>13. How adequately is pain controlled in the ED for PLWD?</li> <li>14. How frequently are alternative measures for pain assessment such as the Behavioral Pain Scale, or Critical Care Pain Observation Tool used in the ED for PLWD?</li> <li>15. How frequently are alternative measures for pain assessment such as the Behavioral Pain Scale or Critical Care Pain Observation Tool taught to emergency clinicians?</li> <li>16. How accurate are screening techniques which are commonly used ED for PLWD? Commonly used screening techniques may include techniques to identify delirium, pain, depression, and abuse.</li> <li>17. What are the knowledge and training gaps for emergency clinicians and nonclinical staff regarding optimal care of PLWD? Non-clinical staff may include personnel such as security, and registration.</li> <li>18. How can emergency clinicians best interact with care partners to provide optimal ED care for PLWD?</li> <li>19. How does care partner involvement impact ED care for PLWD? Are these impacts different when care partners are present compared to paid caregivers?</li> <li>20. What are the impacts of pragmatic approaches to providing acute unscheduled care such as home care, community paramedicine, telemedicine, or 3D telemedicine on patient-centered outcomes for PLWD?</li> <li>21. How do emergency clinicians best connect PLWD with community resources?</li> <li>22. When concern for dementia or cognitive impairment is identified in the ED, how do clinicians address concerns with patient autonomy and capacity? Should these concerns be reported to anyone? For example, the patient's family, primary care clinician, or adult protective services.</li> </ol> | <p><b>Question 1:</b> <i>What components of emergency department care improve patient-centered outcomes for persons with dementia?</i></p> <p><b>Question 2:</b> <i>How do emergency care needs for persons with dementia differ from other patients in the emergency department?</i></p> |

### *Medical Librarian Collaboration*

Medical librarians from each workgroup leads institution working together developed a standardized core search strategy for the workgroups, as well as topic specific modifications for the scoping reviews. Prior studies have demonstrated this collaboration style creates higher quality search strategies and minimizes review bias.<sup>24-26</sup> To confirm the search strategies developed would capture the articles sought after, exemplar articles were identified. The searches were reviewed to ensure inclusion of these articles. The only exclusion filter applied to the search was to limit the focus to an adult patient population. No other publication type, language, or date filters were applied.

The librarians worked together to identify relevant bibliographic databases to maximize capture of relevant articles while limiting duplication. Databases searched included Medline (Ovid), Embase, Cochrane Central Register of Controlled Trials, CINAHL, PsychINFO, PubMed Central, Web of Science, and ProQuest Theses and Dissertations. For a list of databases used by the Workgroups, see Table 5. Databases searched by Workgroups. Each site librarian conducted the literature search, identified article duplication, and uploaded the results to Covidence, a systematic review software (Veritas Health Innovation, Melbourne, Australia. Available at [www.covidence.org](http://www.covidence.org)). Search strategies began at the earliest year databases began indexing until March 2021 and focused on emergency care and The scoping reviews for each group are registered on Open Science Framework.<sup>27-30</sup>

Table 5. Databases searched by Workgroups

| Database searched | Workgroup |
|-------------------|-----------|
|-------------------|-----------|

|                                                | Detection | Communication | Practices | Transitions |
|------------------------------------------------|-----------|---------------|-----------|-------------|
| MEDLINE (Ovid)                                 | X         | X             | X         | X           |
| Embase                                         | X         | X             | X         | X           |
| Cochrane Central Register of Controlled Trials | X         | X             | X         | X           |
| CINAHL (Ebsco)                                 | X         | X             | X         | X           |
| PsycINFO (Ebsco)                               | X         | X             | X         |             |
| PubMed Central                                 | X         | X             | X         | X           |
| Web of Science                                 | X         | X             | X         | X           |
| ProQuest Theses & Dissertations                |           | X             |           |             |

The workgroup lead and a trained research associate from each workgroup independently screened the titles and abstracts of all articles uploaded into Covidence for relevance. Each workgroup created unique inclusion and exclusion criteria based on workgroup consensus. Future publications will present the findings of the workgroups. The reviewers adjudicated any disagreements. If they did not agree, a third-party reviewer made the final decision. The full text of articles identified as potentially relevant were then reviewed in the same manner. Data were abstracted from the articles deemed relevant. To ensure consistency in the conduct of the scoping reviews, workgroup leads and project team members discussed progress at the biweekly meetings and communicated frequently through email correspondence.

Phase 1: GEAR 2.0 ADC Consensus Conference

1  
2  
3 The culmination of the scoping review process resulted in presentations of these  
4  
5 synthesized results from each domain at a two-day consensus conference of the full GEAR 2.0  
6  
7 ADC Taskforce in September 2021. At the conference, Taskforce members were mixed and  
8  
9 distributed across smaller groups to discuss the findings of the scoping reviews. The goal of  
10  
11 these small groups was to provide stakeholder insight and recommendations on the current  
12  
13 knowledge base and to provide suggestions for future research and pilot grants. After small  
14  
15 group discussion, there was an opportunity for shared debrief of these breakout sessions. Each  
16  
17 workgroup then incorporated the feedback and themes heard from the small group discussion  
18  
19 to prepare five research priorities, based on the scoping review results and transdisciplinary  
20  
21 stakeholder recommendations. The full taskforce then ranked these research priorities using an  
22  
23 online survey (Polleverywhere.com). Taskforce members unable to attend the conference were  
24  
25 asked to vote asynchronously, for 100% participation by all Taskforce and Health Equity  
26  
27 Advisory Board members. Results of each scoping reviews, their search methodology, data from  
28  
29 included manuscripts, and ranked research priorities will be published separately.  
30  
31  
32  
33  
34  
35  
36  
37  
38  
39

40 Copies of the GEAR and GEAR 2.0 ADC Consensus Conference Summaries are available on the  
41  
42 GEAR website: <https://gearnetwork.org/manuscripts-publications/>  
43  
44  
45  
46

#### 47 Phase 2: GEAR 2.0 ADC Pilot funding

48  
49 During the second phase, pilot funding opportunities will be made available to  
50  
51 investigators. Proposals for pilot studies must address the research priorities recommended by  
52  
53 the GEAR 2.0 ADC Taskforce and HEAB members from the GEAR 2.0 ADC Consensus  
54  
55  
56  
57  
58  
59  
60

1  
2  
3 Conference. During this phase, the GEAR 2.0 ADC Cores will become active and support early  
4  
5 research addressing research gaps and priorities recommended by the GEAR 2.0 ADC Taskforce.  
6  
7  
8 In addition to pilot funding, the Research Core, Data and Informatics Core, and Dissemination  
9  
10 and Implementation Core will provide guidance to pilot awardees as they conduct their studies,  
11  
12 including training sessions to enhance and increase transdisciplinary collaboration within and  
13  
14 across the GEAR 2.0 ADC Network. These will be held as virtual training webinars, conferences  
15  
16 and office hours, and bi-monthly research progress meetings where awardees will have the  
17  
18 opportunity to share their study progress with each other.  
19  
20  
21  
22  
23  
24

25 GEAR 2.0 ADC pilot funding opportunities can be found on the GEAR website:

26  
27 <https://gearnetwork.org/grants-and-funding-opportunities/>  
28  
29  
30  
31

## 32 **DISCUSSION**

33  
34  
35 In this paper we present a framework establishing an infrastructure to advance geriatric  
36  
37 emergency medicine research. The value of this framework, and more importantly the  
38  
39 representation of key stakeholders, is unique and critical to guide optimally future research  
40  
41 addressing practice gaps that matter to all those engaged in all facets of emergency care for  
42  
43 PLWD and their care partners. It differs from other previous agenda setting processes directed  
44  
45 at geriatric emergency care<sup>31-34</sup> in the following ways: 1. The inclusion of stakeholder  
46  
47 participation as part of the scoping review and consensus process to identify research gaps and  
48  
49 priorities, 2. Cross coordination with medical librarians of scoping review searches, 3. Creation  
50  
51 of a Health Equity Advisory Board to ensure meaningful inclusion of diverse populations in  
52  
53  
54  
55  
56  
57  
58  
59  
60

1  
2  
3 studies focused on the emergency care of people living with dementia, and 4. Provision of pilot  
4  
5 funding to initiate research in the recommended consensus research priorities.  
6  
7

8           A significant strength of the GEAR Network approach is the inclusion of patients,  
9  
10 individuals that use the healthcare system, and care partners as part of the process. It is a  
11  
12 priority of the GEAR Network to include their experiences and perspectives and to learn what  
13  
14 matters to them about the emergency care they receive. Further, GEAR Network strives to  
15  
16 share with these stakeholders' reasons why health and medical care occurs the way it does, to  
17  
18 enable them to engage meaningfully, and to integrate their critical feedback and  
19  
20 recommendations on the topics throughout the entire GEAR Network approach. For GEAR 2.0  
21  
22 ADC, this has even greater relevance coupled with challenges faced by PLWD, all of whom have  
23  
24 cognitive impairment with varying degrees of severity. While the PLWD who participate in  
25  
26 GEAR 2.0 ADC are in the early stages of dementia and remain high functioning, they, along with  
27  
28 care partners and many other stakeholders who are not researchers nor clinicians, are not as  
29  
30 familiar with taskforce or agenda setting research processes.  
31  
32  
33  
34  
35  
36

37           Preparatory background steps by the GEAR 2.0 ADC Project Team with these non-  
38  
39 research and non-clinical stakeholders are necessary to support their full engagement.  
40  
41 Following the Empowering Partnership principals of and working with the Livewell Dementia  
42  
43 Specialists organization,<sup>35</sup> GEAR 2.0 ADC set up several working sessions with the non-  
44  
45 researchers and non-clinicians Taskforce members, including separate preparatory video  
46  
47 conferences, providing printed folders of all conference materials in advance of the meeting,  
48  
49 and providing opportunities for feedback about conference format and to address any  
50  
51 questions they might have prior to the conference. There was also an additional debrief  
52  
53  
54  
55  
56  
57  
58  
59  
60

1  
2  
3 session after the GEAR 2.0 ADC Consensus Conference to gather additional suggestions and  
4  
5 feedback about the conference from these individuals. When working with PLWD with early to  
6  
7 middle stage dementia, it is important to recognize there may be varying degrees of cognitive  
8  
9 function that may impact tasks and activities. For example, the survey ranking many potential  
10  
11 questions initially proposed by workgroups required significant mental focus to complete for  
12  
13 individuals of all levels of cognitive function. This was even more challenging for some PLWD  
14  
15 members who found the survey format difficult to comprehend fully. To incorporate their  
16  
17 input, once the top four choices were identified, their thoughts on each were discussed  
18  
19 separately with them. Concurrently, other PLWD members did not express any difficulty with  
20  
21 the survey. It is important that researchers consider the potential limitations of PLWD in  
22  
23 research engagement and find ways to enable their full participation.  
24  
25  
26  
27  
28  
29

30 Another innovative feature of the scoping review process in GEAR 2.0 ADC was the  
31  
32 collaboration of research librarians from four different institution sites and their inclusion early  
33  
34 in PICO question development. Each workgroup's assigned librarian participated in meetings  
35  
36 when PICO question development was occurring. This provided unique insight and  
37  
38 understanding as to the group's thought process that allowed the librarian to craft the  
39  
40 appropriate search strategy. It was decided that the four librarians would develop a  
41  
42 standardized search for the elements consistent between the groups and then tailor the  
43  
44 remaining elements for their specific groups. By cooperating on core search development, the  
45  
46 librarians were quickly able to develop a highly effective search strategy, minimizing bias.<sup>26</sup> The  
47  
48 standardization of the common elements helped ensure consistency in articles identified  
49  
50 between groups.<sup>25</sup>  
51  
52  
53  
54  
55  
56  
57  
58  
59  
60

1  
2  
3 As part of its mission, GEAR 2.0 ADC has also prioritized addressing equity through  
4  
5 diversity and inclusion in its research agenda. The concern is multifactorial as it includes the  
6  
7 diversity and composition of the workgroups, the defining of the questions, and  
8  
9 implementation in the future pilot grants to be offered by GEAR 2.0 ADC. Despite continuous  
10  
11 efforts to increase diversity of the taskforce and while equally split in member gender, the  
12  
13 workgroups and PLWD representatives are overwhelmingly Caucasian. This is a challenge for  
14  
15 many organizations attempting to increase diversity in representation and health equity with  
16  
17 research, especially for PLWD. Within the workgroups, Diversity Equity and Inclusion was  
18  
19 discussed in terms of the patients seen in the ED. The discussions included race, gender,  
20  
21 ethnic/religious affiliation, sex identification, along with the impact of social determinants of  
22  
23 health. Identifying additional workgroup members whose participation would broaden the  
24  
25 groups' diversity would have taken more time than the groups had, thus the decision was made  
26  
27 to create a "Health Equity Advisory Board"(HEAB) of members from underrepresented and  
28  
29 disenfranchised groups to review and provide input on the output of the workgroups and GEAR  
30  
31 2.0 ADC processes. The GEAR 2.0 ADC PIs along with the workgroup leads have developed a  
32  
33 framework for the board that includes quarterly meetings that preview consensus conference  
34  
35 materials to incorporate feedback before the conference and sharing materials and will involve  
36  
37 the HEAB when selecting GEAR 2.0 ADC pilot studies to fund.  
38  
39  
40  
41  
42  
43  
44  
45  
46

47 Finally, perhaps the most significant and unique feature of the GEAR Network research  
48  
49 infrastructure is its provision of pilot funding for the research priorities generated by its  
50  
51 consensus stakeholder process. Support is directed to build preliminary research and evidence  
52  
53 in clinical and research gaps identified by scoping review processes that were voted by  
54  
55  
56  
57  
58  
59  
60



1  
2  
3 transdisciplinary members of the field and by patients and their care partners. This novel  
4  
5 approach targets funding for stated and ranked priorities by “putting money where our mouth  
6  
7 is.” It is hoped that the funding from these pilot studies will foster interest and research in  
8  
9 needed areas of geriatric- and dementia-related emergency care, increase and diversify the  
10  
11 pool and foci of researchers, and generate preliminary evidence and data for larger scale study  
12  
13 proposals that are critically needed to advance the science of geriatric emergency care.  
14  
15  
16

17  
18 In summary, the GEAR Network approach provides a framework and systematic  
19  
20 approach to review the literature for research and practice gaps. Further, the GEAR Network  
21  
22 approach gives insight as to how to engage key stakeholders from all facets of caring for older  
23  
24 adults and persons living with dementia to define and state what research priorities matter.  
25  
26 This approach may be used by other disciplines, professions, and specialties to advance  
27  
28 research priorities in aging.  
29  
30  
31  
32  
33  
34  
35  
36  
37  
38  
39  
40  
41  
42  
43  
44  
45  
46  
47  
48  
49  
50  
51  
52  
53  
54  
55  
56  
57  
58  
59  
60

1  
2  
3 Statements/Declarations  
4

5  
6 *Authors' contributions:*  
7

8 All authors read and approved the final manuscript.  
9

10 CRC conceived the approach, provided methodological guidance, oversaw the implementation  
11 and operations of the approach, and provided review and edits in the writing\_\_\_\_  
12  
13

14 SD organized the implementation and operations of the approach and was a major contributor  
15 in writing  
16

17  
18 JD organized the implementation and operations of the research approach and was a major  
19 contributor in writing the manuscript.  
20

21 AG organized the implementation and operations of the research approach and was a major  
22 contributor in writing the manuscript.  
23  
24

25 LH organized the implementation and operations of the research approach and was a major  
26 contributor in writing the manuscript.  
27  
28

29 UH secured funding, conceived the approach, organized the infrastructure and partnerships,  
30 organized the implementation and operations of the approach, was a major contributor in  
31 writing and overseeing the manuscript.  
32  
33

34 JL organized the implementation and operations of the research approach and was a major  
35 contributor in writing the manuscript.  
36  
37

38 AN organized the implementation and operations of the research approach and was a major  
39 contributor in writing the manuscript.  
40  
41

42 MNS secured funding, conceived the approach, organized the infrastructure and partnerships,  
43 organized the implementation and operations of the approach, was a major contributor in  
44 writing and overseeing the manuscript.  
45  
46

47 ZT organized the implementation and operations of the research approach and was a major  
48 contributor in writing the manuscript.  
49

---

50  
51 *Funding Statement:*

52 This work and the GEAR Networks are funded and supported by the following organizations,  
53 each of which fosters and supports the development of research infrastructures to promote  
54 studies that address the research and clinical gaps in the aging process and related health fields  
55 through: (1) research performed and proposed through contracts; (2) a program of research  
56  
57  
58  
59  
60

1  
2  
3 grants and individual and institutional pilot awards; (3) cooperation and collaboration with  
4 other Departmental agencies, voluntary organizations, and other institutions; and (4) collection  
5 and dissemination of the findings of aging and dementia related studies.  
6  
7

8 National Institute on Aging [R33 AG058926 (Hwang)]  
9

10 National Institute on Aging [R61 AG069822 (Hwang, Shah)]  
11

12 Emergency Medicine Foundation [N/A]  
13

14 The Gary and Mary West Health Institute [The Geriatric Emergency Department Collaborative]  
15

16 The John A. Hartford Foundation [The Geriatric Emergency Department Collaborative]  
17  
18  
19  
20  
21  
22

---

23  
24 *Competing interest statements:*

25 CRC – none

26 SD – none

27 JD – none

28 AG – none

29 LH – none

30 UH – none

31 JL – none

32 AN – none

33 MS – none

34 ZT – none  
35  
36  
37  
38  
39  
40  
41  
42  
43  
44  
45  
46  
47  
48  
49  
50  
51  
52  
53  
54  
55  
56  
57  
58  
59  
60

## REFERENCES:

1. National Center for Health Statistics. Health, United States, 2015: With special feature on racial and ethnic disparities. Hyattsville, MD: U.S. Centers for Disease Control & Prevention; 2015.
2. Tang N, Stein J, Hsia RY, Maselli JH, Gonzales R. Trends and characteristics of US emergency department visits, 1997-2007. *JAMA*. 2010;304:664-670.
3. Ukkonen M, Jämsen E, Zeitlin R, Pauniah SL. Emergency department visits in older patients: a population-based survey. *BMC Emerg Med*. 2019;19:20.
4. Hwang U, Morrison RS. The Geriatric Emergency Department. *J Am Geriatr Soc*. 2007;55:1873-1876.
5. Hwang U, Shah MN, Han JH, Carpenter CR, Siu AL, Adams J. Transforming Emergency Care for Older Adults. *Health Aff*. 2013;32:2116-2121.
6. American College of Emergency Physicians; American Geriatrics Society; Emergency Nurses Association; Society for Academic Emergency Medicine; and Geriatric Emergency Department Guidelines Task Force. Geriatric emergency department guidelines. *Ann Emerg Med*. 2014;63:e7-25.
7. Schumacher JG, Hirshon JM, Magidson P, Chrisman M, Hogan T. Tracking the Rise of Geriatric Emergency Departments in the United States. *J Appl Gerontol*. 2020;39:871-879.
8. Kennedy M, Lesser A, Israni J, et al. Reach and Adoption of a Geriatric Emergency Department Accreditation Program in the United States. *Ann Emerg Med*. 2021.
9. Wilber ST. Geriatric Emergency Medicine. In: Solomon D, LoCicero J, Rosenthal R, eds. *New Frontiers in Geriatric Research*. New York, NY: American Geriatric Society; 2004:53-83.
10. Carpenter CR, Banerjee J, Keyes D, et al. Accuracy of Dementia Screening Instruments in Emergency Medicine: A Diagnostic Meta-analysis. *Acad Emerg Med*. 2019;26:226-245.
11. Hogan TM, Olade TO, Carpenter CR. A profile of acute care in an aging America: Snowball sample identification and characterization of United States Geriatric Emergency Departments in 2013. *Acad Emerg Med*. 2014;21:337-346.
12. GEAR Network. Geriatric Emergency care Applied Research. Updated 2022. Accessed September 10, 2021. <https://gearnetwork.org/>
13. Kayser J, Morrow-Howell N, Rosen TE, et al. Research priorities for elder abuse screening and intervention: A Geriatric Emergency Care Applied Research (GEAR) network scoping review and consensus statement. *J Elder Abuse Negl*. 2021;33:123-144.
14. Carpenter CR, Hammouda N, Linton EA, et al. Delirium Prevention, Detection, and Treatment in Emergency Medicine Settings: A Geriatric Emergency Care Applied Research (GEAR) Network Scoping Review and Consensus Statement. *Acad Emerg Med*. 2021;28:19-35.
15. Hammouda N, Carpenter CR, Hung WW, et al. Moving the needle on fall prevention: A Geriatric Emergency Care Applied Research (GEAR) Network scoping review and consensus statement. *Acad Emerg Med*. 2021.

16. Gettel CJ, Voils CI, Bristol AA, et al. Care transitions and social needs: A Geriatric Emergency care Applied Research (GEAR) Network scoping review and consensus statement. *Acad Emerg Med*. 2021.
17. Carpenter CR, McFarland F, Avidan M, et al. Impact of Cognitive Impairment Across Specialties: Summary of a Report From the U13 Conference Series. *J Am Geriatr Soc*. 2019;67:2011-2017.
18. Health Disparities Framework. National Institute on Aging. November 5, 2018. Accessed December 11<sup>th</sup>, 2021. <https://www.nia.nih.gov/research/osp/framework>
19. Health Equity Team. NIA IMPACT Collaboratory Transforming Dementia Care. Updated 2022. Accessed December 12<sup>th</sup>, 2021. <https://impactcollaboratory.org/about-us/cores-and-teams/health-equity-team/>
20. Sabir M, Breckman R, Meador R, Wethington E, Reid MC, Pillemer K. The CITRA research-practice consensus-workshop model: exploring a new method of research translation in aging. *Gerontologist*. 2006;46:833-839.
21. Schardt C, Adams MB, Owens T, Keitz S, Fontelo P. Utilization of the PICO framework to improve searching PubMed for clinical questions. *BMC Med Inform Decis Mak*. 2007;7:16.
22. Tricco AC, Lillie E, Zarin W, et al. PRISMA Extension for Scoping Reviews (PRISMA-ScR): Checklist and Explanation. *Ann Intern Med*. 2018;169:467-473.
23. Chambers D, Simpson L, Hill-Briggs F, et al. Proceedings of the 8th Annual Conference on the Science of Dissemination and Implementation : Washington, DC, USA. 14-15 December 2015. *Implement Sci*. 2016;11 Suppl 2:100.
24. Peters MD, Godfrey CM, Khalil H, McInerney P, Parker D, Soares CB. Guidance for conducting systematic scoping reviews. *Int J Evid Based Healthc*. 2015;13:141-146.
25. Rethlefsen ML, Farrell AM, Osterhaus Trzasko LC, Brigham TJ. Librarian co-authors correlated with higher quality reported search strategies in general internal medicine systematic reviews. *J Clin Epidemiol*. 2015;68:617-626.
26. Aamodt M, Huurdeman H, Strømme H. Librarian Co-Authored Systematic Reviews are Associated with Lower Risk of Bias Compared to Systematic Reviews with Acknowledgement of Librarians or No Participation by Librarians. *Evidence Based Library and Information Practice*. 2019;14:103-127.
27. Brackett AL, Shah MN. Geriatric Emergency Care Applied Research Network 2.0 – Advancing Dementia Care (GEAR 2.0 ADC) - Care Transitions Work Group. June 30 ed: Open Science Framework; 2021.
28. Brackett AL, Carpenter CR. Geriatric Emergency Care Applied Research Network 2.0 – Advancing Dementia Care (GEAR 2.0 ADC) – Communication & Decision Making Workgroup. *Open Science Framework*. Vol 2021. June 30 ed: Open Science Framework; 2021.
29. Brackett AL, Hwang U. Geriatric Emergency Care Applied Research Network 2.0 – Advancing Dementia Care (GEAR 2.0 ADC) - Detection and Identification Work Group. June 30 ed: Open Science Framework; 2021.
30. Brackett AL, Dresden S. Geriatric Emergency Care Applied Research Network 2.0 – Advancing Dementia Care (GEAR 2.0 ADC) – Emergency Department Practices Workgroup. June 30 ed: Open Science Framework; 2021.

- 1
- 2
- 3
- 4 **31.** Wilber ST. Geriatric Emergency Medicine. In: Solomon D, LoCicero J, Rosenthal R, eds.
- 5 *New Frontiers in Geriatric Research*. New York, NY: American Geriatrics Society;
- 6 2004:53-83.
- 7 **32.** Carpenter CR, Gerson LW. Geriatric Emergency Medicine. In: Solomon D, LoCicero J,
- 8 Rosenthal R, eds. *New Frontiers in Geriatric Research*. New York, NY: American Geriatrics
- 9 Society; 2008.
- 10 **33.** Carpenter CR, Heard K, Wilber S, et al. Research priorities for high-quality geriatric
- 11 emergency care: medication management, screening, and prevention and functional
- 12 assessment. *Acad Emerg Med*. 2011;18:644-654.
- 13 **34.** Carpenter CR, Shah MN, Hustey FM, Heard K, Gerson LW, Miller DK. High yield research
- 14 opportunities in geriatric emergency medicine: prehospital care, delirium, adverse drug
- 15 events, and falls. *J Gerontol A Biol Sci Med Sci*. 2011;66:775-783.
- 16 **35.** Empowering Partnerships. LiveWell Dementia Specialists. 2019. Accessed January 5<sup>th</sup>,
- 17 2022. <https://livewell.org/empoweringpartners/>
- 18
- 19
- 20
- 21
- 22
- 23
- 24
- 25
- 26
- 27
- 28
- 29
- 30
- 31
- 32
- 33
- 34
- 35
- 36
- 37
- 38
- 39
- 40
- 41
- 42
- 43
- 44
- 45
- 46
- 47
- 48
- 49
- 50
- 51
- 52
- 53
- 54
- 55
- 56
- 57
- 58
- 59
- 60

1  
2  
3  
4  
5  
6  
7  
8  
9  
10  
11  
12  
13  
14  
15  
16  
17  
18  
19  
20  
21  
22  
23  
24  
25  
26  
27  
28  
29  
30  
31  
32  
33  
34  
35  
36  
37  
38  
39  
40  
41  
42  
43  
44  
45  
46  
47  
48  
49  
50  
51  
52  
53  
54  
55  
56  
57  
58  
59  
60

Figure Legends

Figure 1. GEAR 2.0 ADC Organizational Structure

Figure 2. GEAR 2.0 ADC Taskforce Composition

For peer review only

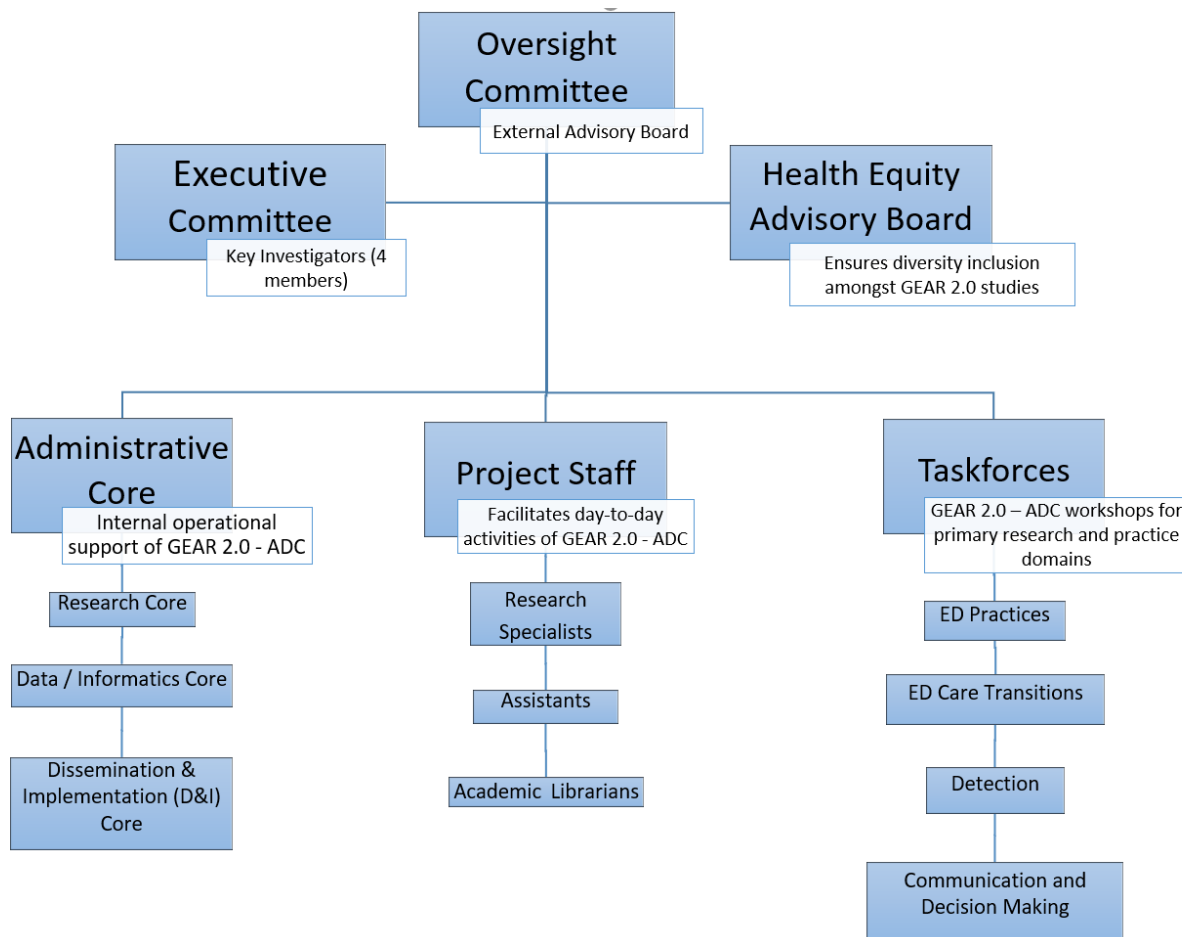

ew only



1  
2  
3  
4  
5  
6  
7  
8  
9  
10  
11  
12  
13  
14  
15  
16  
17  
18  
19  
20  
21  
22  
23  
24  
25  
26  
27  
28  
29  
30  
31  
32  
33  
34  
35  
36  
37  
38  
39  
40  
41  
42  
43  
44  
45  
46  
47

### GEAR 2.0 Taskforce Composition (n=47 individuals\*)

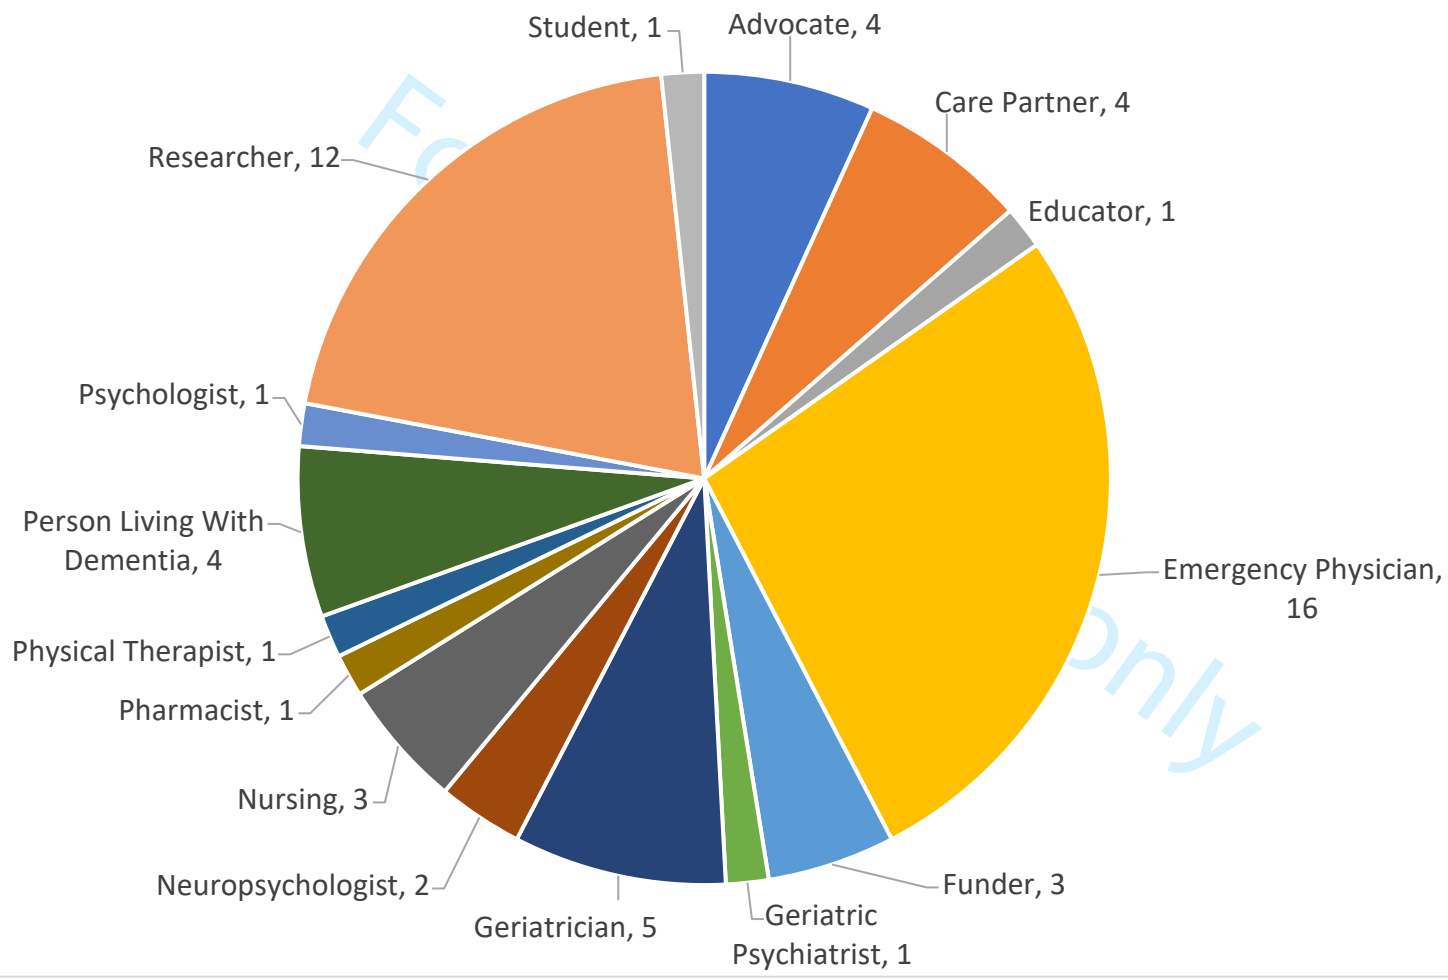

\* Identification categories not mutually exclusive

## Preferred Reporting Items for Systematic reviews and Meta-Analyses extension for Scoping Reviews (PRISMA-ScR) Checklist

| SECTION                                               | ITEM | PRISMA-ScR CHECKLIST ITEM                                                                                                                                                                                                                                                                                  | REPORTED ON PAGE # |
|-------------------------------------------------------|------|------------------------------------------------------------------------------------------------------------------------------------------------------------------------------------------------------------------------------------------------------------------------------------------------------------|--------------------|
| <b>TITLE</b>                                          |      |                                                                                                                                                                                                                                                                                                            |                    |
| Title                                                 | 1    | Identify the report as a scoping review.                                                                                                                                                                                                                                                                   | 1                  |
| <b>ABSTRACT</b>                                       |      |                                                                                                                                                                                                                                                                                                            |                    |
| Structured summary                                    | 2    | Provide a structured summary that includes (as applicable): background, objectives, eligibility criteria, sources of evidence, charting methods, results, and conclusions that relate to the review questions and objectives.                                                                              | 3-4                |
| <b>6-7INTRODUCTION</b>                                |      |                                                                                                                                                                                                                                                                                                            |                    |
| Rationale                                             | 3    | Describe the rationale for the review in the context of what is already known. Explain why the review questions/objectives lend themselves to a scoping review approach.                                                                                                                                   | 6-7                |
| Objectives                                            | 4    | Provide an explicit statement of the questions and objectives being addressed with reference to their key elements (e.g., population or participants, concepts, and context) or other relevant key elements used to conceptualize the review questions and/or objectives.                                  | 6                  |
| <b>METHODS</b>                                        |      |                                                                                                                                                                                                                                                                                                            |                    |
| Protocol and registration                             | 5    | Indicate whether a review protocol exists; state if and where it can be accessed (e.g., a Web address); and if available, provide registration information, including the registration number.                                                                                                             | 5                  |
| Eligibility criteria                                  | 6    | Specify characteristics of the sources of evidence used as eligibility criteria (e.g., years considered, language, and publication status), and provide a rationale.                                                                                                                                       | 13-15              |
| Information sources*                                  | 7    | Describe all information sources in the search (e.g., databases with dates of coverage and contact with authors to identify additional sources), as well as the date the most recent search was executed.                                                                                                  | 14                 |
| Search                                                | 8    | Present the full electronic search strategy for at least 1 database, including any limits used, such that it could be repeated.                                                                                                                                                                            | 14                 |
| Selection of sources of evidence†                     | 9    | State the process for selecting sources of evidence (i.e., screening and eligibility) included in the scoping review.                                                                                                                                                                                      | 14                 |
| Data charting process‡                                | 10   | Describe the methods of charting data from the included sources of evidence (e.g., calibrated forms or forms that have been tested by the team before their use, and whether data charting was done independently or in duplicate) and any processes for obtaining and confirming data from investigators. | 15                 |
| Data items                                            | 11   | List and define all variables for which data were sought and any assumptions and simplifications made.                                                                                                                                                                                                     | 15                 |
| Critical appraisal of individual sources of evidence§ | 12   | If done, provide a rationale for conducting a critical appraisal of included sources of evidence; describe the methods used and how this information was used in any data synthesis (if appropriate).                                                                                                      | n/a                |

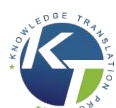

| SECTION                                       | ITEM | PRISMA-ScR CHECKLIST ITEM                                                                                                                                                                       | REPORTED ON PAGE # |
|-----------------------------------------------|------|-------------------------------------------------------------------------------------------------------------------------------------------------------------------------------------------------|--------------------|
| Synthesis of results                          | 13   | Describe the methods of handling and summarizing the data that were charted.                                                                                                                    | n/a                |
| <b>RESULTS</b>                                |      |                                                                                                                                                                                                 |                    |
| Selection of sources of evidence              | 14   | Give numbers of sources of evidence screened, assessed for eligibility, and included in the review, with reasons for exclusions at each stage, ideally using a flow diagram.                    | n/a                |
| Characteristics of sources of evidence        | 15   | For each source of evidence, present characteristics for which data were charted and provide the citations.                                                                                     | n/a                |
| Critical appraisal within sources of evidence | 16   | If done, present data on critical appraisal of included sources of evidence (see item 12).                                                                                                      | n/a                |
| Results of individual sources of evidence     | 17   | For each included source of evidence, present the relevant data that were charted that relate to the review questions and objectives.                                                           | n/a                |
| Synthesis of results                          | 18   | Summarize and/or present the charting results as they relate to the review questions and objectives.                                                                                            | n/a                |
| <b>DISCUSSION</b>                             |      |                                                                                                                                                                                                 |                    |
| Summary of evidence                           | 19   | Summarize the main results (including an overview of concepts, themes, and types of evidence available), link to the review questions and objectives, and consider the relevance to key groups. | n/a                |
| Limitations                                   | 20   | Discuss the limitations of the scoping review process.                                                                                                                                          | n/a                |
| Conclusions                                   | 21   | Provide a general interpretation of the results with respect to the review questions and objectives, as well as potential implications and/or next steps.                                       | n/a                |
| <b>FUNDING</b>                                |      |                                                                                                                                                                                                 |                    |
| Funding                                       | 22   | Describe sources of funding for the included sources of evidence, as well as sources of funding for the scoping review. Describe the role of the funders of the scoping review.                 | 22-23              |

JBI = Joanna Briggs Institute; PRISMA-ScR = Preferred Reporting Items for Systematic reviews and Meta-Analyses extension for Scoping Reviews.

\* Where *sources of evidence* (see second footnote) are compiled from, such as bibliographic databases, social media platforms, and Web sites.

† A more inclusive/heterogeneous term used to account for the different types of evidence or data sources (e.g., quantitative and/or qualitative research, expert opinion, and policy documents) that may be eligible in a scoping review as opposed to only studies. This is not to be confused with *information sources* (see first footnote).

‡ The frameworks by Arksey and O'Malley (6) and Levac and colleagues (7) and the JBI guidance (4, 5) refer to the process of data extraction in a scoping review as data charting.

§ The process of systematically examining research evidence to assess its validity, results, and relevance before using it to inform a decision. This term is used for items 12 and 19 instead of "risk of bias" (which is more applicable to systematic reviews of interventions) to include and acknowledge the various sources of evidence that may be used in a scoping review (e.g., quantitative and/or qualitative research, expert opinion, and policy document).

From: Tricco AC, Lillie E, Zarin W, O'Brien KK, Colquhoun H, Levac D, et al. PRISMA Extension for Scoping Reviews (PRISMA-ScR): Checklist and Explanation. *Ann Intern Med.* 2018;169:467–473. doi: 10.7326/M18-0850.



St. Michael's

Inspired Care.  
Inspiring Science.

For peer review only - <http://bmjopen.bmj.com/site/about/guidelines.xhtml>
